# Supplementary material for: The generation of phosphoserine stretches in phosphoproteins: mechanism and significance
Source: Royal Society of Chemistry journal article supplement (doi:10.1039/c5mb00337g), 2015-07-17
Supplement: c5mb00337g1.pdf [file c5mb00337g1.pdf]

Table S1 Repertoire of human proteins that contain stretches of 3 or more consecutive phosphoserine. Drawn from PhosphoSitePlus<sup>2</sup> (<http://www.phosphosite.org>).

| ID           | Description                                                         | Sequence including (pS) <sub>n</sub> clusters (n≥3) |
|--------------|---------------------------------------------------------------------|-----------------------------------------------------|
| A0FGR8       | ESYT2_HUMAN Extended synaptotagmin-2                                | QGLHDLGRssssLLAsPGHI                                |
| A0JNW5       | UH1BL_HUMAN UHRF1-binding protein 1-like                            | VSYKNMKRssssQMSLDTIS                                |
| A0MZ66       | SHOT1_HUMAN Shootin-1                                               | RKVtAEADssssPtGILATS                                |
| A1L390       | PKHG3_HUMAN Pleckstrin homology domain-containing family G member 3 | GsPRLVSRssssVLsLEGsE                                |
| A6NDN3       | GOG6B_HUMAN Putative golgin subfamily A member 6B                   | TQQQEDRssssCREAVLHR                                 |
| A6NKT7       | RGPD3_HUMAN RanBP2-like and GRIP domain-containing protein 3        | EDALDDsVssssVHAsPLAs                                |
| A6NL88       | SHSA7_HUMAN Protein shisa-7                                         | GTRPDRARssssLTPGIGGP                                |
| A6NNA2       | SRRM3_HUMAN Serine/arginine repetitive matrix protein 3             | RGYRTKHwssssSASPPPKK                                |
| A7Y9J9       | A7Y9J9_HUMAN Mucin 5AC, oligomeric mucus/gel-forming                | TATsSKATssssPRTATTLP                                |
| A7Y9J9       | A7Y9J9_HUMAN Mucin 5AC, oligomeric mucus/gel-forming                | VTSSKATPssssPGTATALP                                |
| A8CG34       | P121C_HUMAN Nuclear envelope pore membrane protein POM 121C         | DHLNKRsrssssMssLtGay                                |
| A8CG34       | P121C_HUMAN Nuclear envelope pore membrane protein POM 121C         | REEELCHHsssstPLAADKE                                |
| A8MQ03       | CRTP1_HUMAN Cysteine-rich tail protein 1                            | WQQPGNPyssssQRQAGLty                                |
| A8MUH7       | PDZ1P_HUMAN Putative PDZ domain-containing protein 1P               | RAHStAsHssssNsEDTEM-                                |
| A9Z1X7       | A9Z1X7_HUMAN Serine/arginine repetitive matrix protein 1            | sPQsVRRVssssRsVsGsPE                                |
| B2RXH8       | HNRC2_HUMAN Heterogeneous nuclear ribonucleoprotein C-like 2        | AKSEEEQSssssMKKDEtHV                                |
| B3KS81       | SRRM5_HUMAN Serine/arginine repetitive matrix protein 5             | ERERRQSRssssEERDHsRS                                |
| B5ME49       | B5ME49_HUMAN Mucin-16                                               | DTIKEVTsSSssVLRTLntL                                |
| F5H4B4       | F227A_HUMAN Protein FAM227A                                         | SRKFyHPQssssANSPSEKT                                |
| NP_001139669 | coiled-coil domain-containing protein 168 [Homo sapiens]            | EDVMKKPFssssTQDSFQSQ                                |
| O00418       | EF2K_HUMAN Eukaryotic elongation factor 2 kinase                    | NLTKsERYssssGsPANsFH                                |
| O00423       | EMAL1_HUMAN Echinoderm microtubule-associated protein-like 1        | TKSNIKRtssssERVsPGGR                                |
| O00567       | NOP56_HUMAN Nucleolar protein 56                                    | LALAsSENsssstPEECEEM                                |
| O00567       | NOP56_HUMAN Nucleolar protein 56                                    | GPEEAVGKssssKkkkKfHK                                |
| O00571       | DDX3X_HUMAN ATP-dependent RNA helicase DDX3X                        | yDKDSSGWssssKDKDAyss                                |
| O00571       | DDX3X_HUMAN ATP-dependent RNA helicase DDX3X                        | sGASSSsFssssRAsSSRSG                                |
| O14511       | NRG2_HUMAN Pro-neuregulin-2, membrane-bound isoform                 | SsSSsERSssssSSSESGsS                                |
| O14545       | TRAD1_HUMAN TRAF-type zinc finger domain-containing protein 1       | ALPsLNtGssssPRGVEEPD                                |

|          |                                                                      |                        |
|----------|----------------------------------------------------------------------|------------------------|
| O14640   | DVL1_HUMAN Segment polarity protein dishevelled homolog DVL-1        | TALSSELEsssFVDSDEDG    |
| O14715   | RGPD8_HUMAN RANBP2-like and GRIP domain-containing protein 8         | EDALDDsVssssVHAsPLAs   |
| O14757   | CHK1_HUMAN Serine/threonine-protein kinase Chk1                      | ssEENVKYsssQPEPRTGL    |
| O14920   | IKKB_HUMAN Inhibitor of nuclear factor kappa-B kinase subunit beta   | DLNGTVKFsssLPyPNNLN    |
| O14936-3 | CSKP_HUMAN Isoform 3 of Peripheral plasma membrane protein CASK      | IVPSYRTQsssCEDLPSTT    |
| O14974   | MYPT1_HUMAN Protein phosphatase 1 regulatory subunit 12A             | RsAssPRLsssLDNKEKEK    |
| O15014   | ZN609_HUMAN Zinc finger protein 609                                  | GSKKEKENsssKsKKERSE    |
| O15014   | ZN609_HUMAN Zinc finger protein 609                                  | PlsDMELNsssEDSKGSKR    |
| O15021   | MAST4_HUMAN Microtubule-associated serine/threonine-protein kinase 4 | AsVPPVLPsssGKKNDTTS    |
| O15042   | SR140_HUMAN U2 snRNP-associated SURP motif-containing protein        | stsPsPsRsssGRRVKsPs    |
| O15047   | SET1A_HUMAN Histone-lysine N-methyltransferase SETD1A                | ETAESRRRsssDtAAYPAG    |
| O15047   | SET1A_HUMAN Histone-lysine N-methyltransferase SETD1A                | ASSSsLSSssssssSSSSSQFR |
| O15047   | SET1A_HUMAN Histone-lysine N-methyltransferase SETD1A                | STSDSESSssssSSSSSsss   |
| O15047   | SET1A_HUMAN Histone-lysine N-methyltransferase SETD1A                | sssSSSSSssssSSSSSSSS   |
| O15119   | TBX3_HUMAN T-box transcription factor TBX3                           | sRHsPATIssstRGLGAE     |
| O15197   | EPHB6_HUMAN Ephrin type-B receptor 6                                 | ADEsFPSSssssSSSSSAAW   |
| O15205   | UBD_HUMAN Ubiquitin D                                                | RHLLQVRRsssVAQVKAMI    |
| O15265   | ATX7_HUMAN Ataxin-7                                                  | MQSRQVSSsssPSTPSGLs    |
| O15265   | ATX7_HUMAN Ataxin-7                                                  | SPLLvhSSssssSSSSSSHS   |
| O15417   | TNC18_HUMAN Trinucleotide repeat-containing gene 18 protein          | QDGAESEsssSSSSGSSs     |
| O15417   | TNC18_HUMAN Trinucleotide repeat-containing gene 18 protein          | ssSSSGSSssssSSSSGSET   |
| O15417   | TNC18_HUMAN Trinucleotide repeat-containing gene 18 protein          | RAASPASSssssSSSSSsss   |
| O15417   | TNC18_HUMAN Trinucleotide repeat-containing gene 18 protein          | sssSSSSSssssSSSSSSSS   |
| O15417   | TNC18_HUMAN Trinucleotide repeat-containing gene 18 protein          | sssSsSSSssssSSSSSsss   |
| O15417   | TNC18_HUMAN Trinucleotide repeat-containing gene 18 protein          | ssssSSSSssssSSsSSsss   |
| O15417   | TNC18_HUMAN Trinucleotide repeat-containing gene 18 protein          | sssSSsSSssssSSSSSsss   |
| O15417   | TNC18_HUMAN Trinucleotide repeat-containing gene 18 protein          | sssSSsSSssssSSSSSsss   |
| O15417   | TNC18_HUMAN Trinucleotide repeat-containing gene 18 protein          | sssSSSSSssssSSSSSSST   |
| O15480   | MAGB3_HUMAN Melanoma-associated antigen B3                           | RKCSKAKAsssHA-----     |
| O15541   | R113A_HUMAN RING finger protein 113A                                 | DPEPGEsGsssDEGCTVVR    |
| O43164   | PJA2_HUMAN E3 ubiquitin-protein ligase Praja-2                       | FSGTEKDQsssDEsWEtLP    |
| O43237   | DC1L2_HUMAN Cytoplasmic dynein 1 light intermediate chain 2          | RGGPAsVPsssPGtSVKKP    |
| O43290   | SNUT1_HUMAN U4/U6.U5 tri-snRNP-associated protein 1                  | EEALLKKMsssDtPLGtVA    |
| O43379   | WDR62_HUMAN WD repeat-containing protein 62                          | LPEGPSVPsssLPQtPEQE    |

|          |                                                                                   |                      |
|----------|-----------------------------------------------------------------------------------|----------------------|
| O43462   | MBTP2_HUMAN Membrane-bound transcription factor site-2 protease                   | DSPSSYSSSSSSSSSSSSSS |
| O43462   | MBTP2_HUMAN Membrane-bound transcription factor site-2 protease                   | SSSSSSSSSSSSSSSSSSSS |
| O43491   | E41L2_HUMAN Band 4.1-like protein 2                                               | sTSLsSEsSSsSEsEEED   |
| O43688   | LPP2_HUMAN Lipid phosphate phosphohydrolase 2                                     | HNHyGyPHsss-----     |
| O43741   | AAKB2_HUMAN 5'-AMP-activated protein kinase subunit beta-2                        | SETSCRDLsssPPGPyGQE  |
| O60237   | MYPT2_HUMAN Protein phosphatase 1 regulatory subunit 12B                          | DRGSSIYRsssPRISALLD  |
| O60238   | BNI3L_HUMAN BCL2/adenovirus E1B 19 kDa protein-interacting protein 3-like         | NGGLEHVPsssIHNGDMEK  |
| O60269   | GRIN2_HUMAN G protein-regulated inducer of neurite outgrowth 2                    | PRLQPLSQsssLLGEGREQ  |
| O60292   | SIIL3_HUMAN Signal-induced proliferation-associated 1-like protein 3              | AFLPLRHRsssEItLSECD  |
| O60293   | ZC3H1_HUMAN Zinc finger C3H1 domain-containing protein                            | HPPSVRMPsssLsESsPRP  |
| O60307   | MAST3_HUMAN Microtubule-associated serine/threonine-protein kinase 3              | SHRFSKVysssEFLAVQPT  |
| O60343-2 | TBCD4_HUMAN Isoform 2 of TBC1 domain family member 4                              | VRSPLLRQsssEQCsDGEG  |
| O60381   | HBP1_HUMAN HMG box-containing protein 1                                           | SYARPPVsssKSEPAFPH   |
| O60759   | CYTIP_HUMAN Cytohesin-interacting protein                                         | RKQLALTRsssLSDFSWsQ  |
| O60812   | HNRC1_HUMAN Heterogeneous nuclear ribonucleoprotein C-like 1                      | AKSEEEQSsssMKKDEtHV  |
| O75081   | MTG16_HUMAN Protein CBFA2T3                                                       | APAAARPRsssAGPEGPQL  |
| O75116   | ROCK2_HUMAN Rho-associated protein kinase 2                                       | QALHIGLDsssIGsGPGDA  |
| O75122   | CLAP2_HUMAN CLIP-associating protein 2                                            | LPQSDRsSsssQEsLNRPF  |
| O75132   | ZBED4_HUMAN Zinc finger BED domain-containing protein 4                           | YAtLAsAEsssKltDLPTV  |
| O75152   | ZC11A_HUMAN Zinc finger CCCH domain-containing protein 11A                        | VIAAVKPLsssVLQEPPAK  |
| O75154   | RFIP3_HUMAN Rab11 family-interacting protein 3                                    | EAEQRRGRsssMGLQEYHs  |
| O75427   | LRCH4_HUMAN Leucine-rich repeat and calponin homology domain-containing protein 4 | RPNsFLFRsssQsGsGPss  |
| O75494   | SRS10_HUMAN Serine/arginine-rich splicing factor 10                               | AKEGRNVysssRyDDyDRY  |
| O75496   | GEMI_HUMAN Geminin                                                                | GTCAEGTVssstDAKPCI-  |
| O75508   | CLD11_HUMAN Claudin-11                                                            | NRfyTAGsssPTHAKSAH   |
| O75582   | KS6A5_HUMAN Ribosomal protein S6 kinase alpha-5                                   | TststETRsssESSHSsSS  |
| O75925   | PIAS1_HUMAN E3 SUMO-protein ligase PIAS1                                          | EVIDLtIDsssDEEEEEPs  |
| O75928   | PIAS2_HUMAN E3 SUMO-protein ligase PIAS2                                          | DVIDLTIEsssDEEEDPPA  |
| O75995   | SASH3_HUMAN SAM and SH3 domain-containing protein 3                               | KKKLSLQRsssFKDFAKsK  |
| O94827   | PKHG5_HUMAN Pleckstrin homology domain-containing family G member 5               | IDAyEVVEsssDEVDKLLK  |
| O94874   | UFL1_HUMAN E3 UFM1-protein ligase 1                                               | TRKELQELsssIKDLVLKS  |

|        |                                                                       |                                           |
|--------|-----------------------------------------------------------------------|-------------------------------------------|
| O94876 | TMCC1_HUMAN Transmembrane and coiled-coil domains protein 1           | VMQSGRPRs s s s t t DAPTSS                |
| O94886 | CSCL1_HUMAN CSC1-like protein 1                                       | RFQRLs s t s s s s GQQDFENE               |
| O94915 | FRYL_HUMAN Protein furry homolog-like                                 | NLStsPINs s s s s YLGyNsNA                |
| O94983 | CMTA2_HUMAN Calmodulin-binding transcription activator 2              | KAHTSPSS s s s s s s SSSGFAEP             |
| O95049 | ZO3_HUMAN Tight junction protein ZO-3                                 | QGRGyDGDs s s s s GsGRSWDE                |
| O95155 | UBE4B_HUMAN Ubiquitin conjugation factor E4 B                         | s s EGVSSsL s s s s P s N s L E t Q       |
| O95292 | VAPB_HUMAN Vesicle-associated membrane protein-associated protein B/C | tPIVSKsL s s s s LDDtEVKK                 |
| O95639 | CPSF4_HUMAN Cleavage and polyadenylation specificity factor subunit 4 | SNNPPLQRs s s s s LIQLTSQN                |
| O95696 | BRD1_HUMAN Bromodomain-containing protein 1                           | RCAsEs s s I s s s s N s P L C D S s      |
| O95777 | LSM8_HUMAN U6 snRNA-associated Sm-like protein LSM8                   | DESHERVF s s s s QGVEQVVL                 |
| O95819 | M4K4_HUMAN Mitogen-activated protein kinase kinase kinase 4           | LVPRPGsG s s s s G s s N s G s Q          |
| O95819 | M4K4_HUMAN Mitogen-activated protein kinase kinase kinase 4           | sGERFRVR s s s s K s E G s P s Q          |
| O95819 | M4K4_HUMAN Mitogen-activated protein kinase kinase kinase 4           | S s t L Q K H K s s s s s F t P F I D P R |
| O95873 | CF047_HUMAN Uncharacterized protein C6orf47                           | YPEPRRVD s s s s E N s G s D W D          |
| O96017 | CHK2_HUMAN Serine/threonine-protein kinase Chk2                       | SSsQsQGI s s s s t s t M P N S s          |
| P00519 | ABL1_HUMAN Tyrosine-protein kinase ABL1                               | tAPtPPKR s s s s F R E M D G Q P          |
| P00519 | ABL1_HUMAN Tyrosine-protein kinase ABL1                               | tGEEEGGG s s s s K R F L R S C s          |
| P04049 | RAF1_HUMAN RAF proto-oncogene serine/threonine-protein kinase         | EsAsPsAL s s s s P N N L s P t G          |
| P04279 | SEMG1_HUMAN Semenogelin-1                                             | KANKI s y Q s s s t E E R R L H Y         |
| P04626 | ERBB2_HUMAN Receptor tyrosine-protein kinase erbB-2                   | GMVHHRHR s s s t R s G G G D L            |
| P04637 | P53_HUMAN Cellular tumor antigen p53                                  | KRALPNnt s s s s P Q P K K K P L          |
| P05787 | K2C8_HUMAN Keratin, type II cytoskeletal 8                            | t s G P G s R I s s s s s F s R V G s s N |
| P05787 | K2C8_HUMAN Keratin, type II cytoskeletal 8                            | s s F G s G A G s s s s F s R t s s s R   |
| P05787 | K2C8_HUMAN Keratin, type II cytoskeletal 8                            | G s s s F s R t s s s s R A V V V K K I   |
| P05814 | CASB_HUMAN Beta-casein                                                | AREtIEsL s s s s E E S I T E Y K          |
| P07332 | FES_HUMAN Tyrosine-protein kinase Fes/Fps                             | LQDDRHst s s s s E Q E R E G G R          |
| P07814 | SYEP_HUMAN Bifunctional glutamate/proline--tRNA ligase                | SKNQGGGL s s s s G A G E G Q G P          |
| P07910 | HNRPC_HUMAN Heterogeneous nuclear ribonucleoproteins C1/C2            | HpsPsPLL s s s s F D L D y D F Q          |
| P07910 | HNRPC_HUMAN Heterogeneous nuclear ribonucleoproteins C1/C2            | NDKsEEEQ s s s s s V K K D E t N V        |
| P08069 | IGF1R_HUMAN Insulin-like growth factor 1 receptor                     | SVPLDPSA s s s s s L P L P D R H s        |
| P08240 | SRPR_HUMAN Signal recognition particle receptor subunit alpha         | GQLQDLDC s s s s D D E G A A Q N          |
| P08670 | VIME_HUMAN Vimentin                                                   | --MStRsV s s s s s y R R M F G G P        |
| P08670 | VIME_HUMAN Vimentin                                                   | GPGtAsRP s s s s R s y V t t s t          |

|        |                                                            |                       |
|--------|------------------------------------------------------------|-----------------------|
| P08729 | K2C7_HUMAN Keratin, type II cytoskeletal 7                 | sARPGGLGsssLyGLGAsR   |
| P08779 | K1C16_HUMAN Keratin, type I cytoskeletal 16                | EVFTSSSSsssRQTRPILK   |
| P08913 | ADA2A_HUMAN Alpha-2A adrenergic receptor                   | TDALDLEEsssDHAERPPG   |
| P09016 | HXD4_HUMAN Homeobox protein Hox-D4                         | PNTKGRSSsssSSSCSsSV   |
| P09651 | ROA1_HUMAN Heterogeneous nuclear ribonucleoprotein A1      | SKQEMASAsssQRGRsGsG   |
| P09651 | ROA1_HUMAN Heterogeneous nuclear ribonucleoprotein A1      | RNQGgyGGsssssyGsGRRF- |
| P0CAP2 | GRL1A_HUMAN DNA-directed RNA polymerase II subunit GRINL1A | VssQAEDtsssFDNLFIDR   |
| POCJ78 | ZN865_HUMAN Zinc finger protein 865                        | PKAEVPSSsssSSSSSSs    |
| POCJ78 | ZN865_HUMAN Zinc finger protein 865                        | sssSSSSSSsssSSSSsSSsS |
| P11137 | MTAP2_HUMAN Microtubule-associated protein 2               | sPRRLsNVsssGsINLLEs   |
| P11274 | BCR_HUMAN Breakpoint cluster region protein                | LPyIDDsPsssPHLsSsKGR  |
| P11277 | SPTB1_HUMAN Spectrin beta chain, erythrocytic              | PVsLWSRLsssWEsLQPEP   |
| P11362 | FGFR1_HUMAN Fibroblast growth factor receptor 1            | LLVRPsRLsssGtPMLAGV   |
| P11388 | TOP2A_HUMAN DNA topoisomerase 2-alpha                      | DVKGsVPLsssPPAtHFPD   |
| P12270 | TPR_HUMAN Nucleoprotein TPR                                | EEVssADIsssEVISQHLV   |
| P13645 | K1C10_HUMAN Keratin, type I cytoskeletal 10                | sSsGsVGEsssKGPRy---   |
| P13807 | GYS1_HUMAN Glycogen s synthase, muscle                     | RNsVDtAtsssLStPsEPL   |
| P14859 | PO2F1_HUMAN POU domain, class 2, transcription factor 1    | NPPSSGgtsssPIKAIFPS   |
| P15056 | BRAF_HUMAN Serine/threonine-protein kinase B-raf           | NQFGQRDRsssAPNVHINT   |
| P15056 | BRAF_HUMAN Serine/threonine-protein kinase B-raf           | PGPQRErksssSsEDRNRM   |
| P15407 | FOSL1_HUMAN Fos-related antigen 1                          | PCAsAHRKsssSSGDPSSD   |
| P15408 | FOSL2_HUMAN Fos-related antigen 2                          | SCSKAHRrsssSGDQSSDs   |
| P15884 | ITF2_HUMAN Transcription factor 4                          | TGSNVEDRsssGSWGNGGH   |
| P15923 | TFE2_HUMAN Transcription factor E2-alpha                   | PDHsNNFsssPstPVGsP    |
| P15924 | DESP_HUMAN Desmoplakin                                     | sVRNLtIRsssFsDtLEES   |
| P15927 | RFA2_HUMAN Replication protein A 32 kDa subunit            | NsGFesygsssyGGAGGYt   |
| P17017 | ZNf14_HUMAN Zinc finger protein 14                         | KQCGKAFIsssHFRLHERT   |
| P17676 | CEBPB_HUMAN CCAAT/enhancer-binding protein beta            | SGsLSTSSsssPPGtPSPA   |
| P17812 | PYRG1_HUMAN CTP synthase 1                                 | DtysDRsGsssPDsEItEL   |
| P18583 | SON_HUMAN Protein SON                                      | sMPERAsEsssEEKDDyEI   |
| P18887 | XRCC1_HUMAN DNA repair protein XRCC1                       | RYLMAGPGsssEEDEAsHs   |
| P20393 | NR1D1_HUMAN Nuclear receptor subfamily 1 group D member 1  | SDDGSPSSsssSSSSSSFY   |
| P20700 | LMNB1_HUMAN Lamin-B1                                       | sRVtVsRAsssRsVRttRG   |
| P20929 | NEBU_HUMAN Nebulin                                         | TTELPQQRsssVATQQTTV   |
| P21333 | FLNA_HUMAN Filamin-A                                       | -----MsssHsRAGQsA     |



|          |                                                                  |                        |
|----------|------------------------------------------------------------------|------------------------|
| P22455   | FGFR4_HUMAN Fibroblast growth factor receptor 4                  | SLVRGVRLsSSSGPALLAGL   |
| P22681   | CBL_HUMAN E3 ubiquitin-protein ligase CBL                        | CDHPKIKPSSSANAIsLA     |
| P23497   | SP100_HUMAN Nuclear autoantigen Sp-100                           | IPsRKRRFSSSDFsDLsNG    |
| P24530   | EDNRB_HUMAN Endothelin B receptor                                | NFRsSNKySSS-----       |
| P25025   | CXCR2_HUMAN C-X-C chemokine receptor type 2                      | DSRPsFVGSSSGHTSTTL-    |
| P25054   | APC_HUMAN Adenomatous polyposis coli protein                     | STPDGFsCSSSLsALsLDE    |
| P25440   | BRD2_HUMAN Bromodomain-containing protein 2                      | VAVSRLsAASSSSSDSSSSS   |
| P25440   | BRD2_HUMAN Bromodomain-containing protein 2                      | AASSSSSDSSSSSSSSSSDtSD |
| P27448   | MARK3_HUMAN MAP/microtubule affinity-regulating kinase 3         | SSELDAsDSSSSNLsLAKVR   |
| P28715   | ERCC5_HUMAN DNA repair protein complementing XP-G cells          | AMQAALLGSSSEEELEsEN    |
| P28715   | ERCC5_HUMAN DNA repair protein complementing XP-G cells          | KNGGATtSSSSDsDDDGGK    |
| P29375   | KDM5A_HUMAN Lysine-specific demethylase 5A                       | FNRVVSsVSSSPRQTMDYD    |
| P29590-2 | PML_HUMAN Isoform PML-5 of Protein PML                           | AEERVVVISSSEdsDAENS    |
| P29590   | PML_HUMAN Protein PML                                            | AEERVVVISSSEdsDAENS    |
| P30305   | MPIP2_HUMAN M-phase inducer phosphatase 2                        | sEAGsGAASSSGEDKENDG    |
| P30414   | NKTR_HUMAN NK-tumor recognition protein                          | SKRRKEASSSEPRNKHA      |
| P30518   | V2R_HUMAN Vasopressin V2 receptor                                | QDESCTTASSSLAKDTSS-    |
| P30622   | CLIP1_HUMAN CAP-Gly domain-containing linker protein 1           | LKENKRQLSSSSGNtDtQAD   |
| P32519   | ELF1_HUMAN ETS-related transcription factor Elf-1                | NQTSRSRVSSSPGVKGGAT    |
| P33527   | MRP1_HUMAN Multidrug resistance-associated protein 1             | GKQLQRQLSSSSysGDIrRH   |
| P35527   | K1C9_HUMAN Keratin, type I cytoskeletal 9                        | GGGGGRFSSSSGYGGSS      |
| P35555   | FBN1_HUMAN Fibrillin-1                                           | LCPEGFSLSSSGRRQDLR     |
| P35580   | MYH10_HUMAN Myosin-10                                            | RRGGPIsFSSSRSGRRQLH    |
| P35609   | ACTN2_HUMAN Alpha-actinin-2                                      | IQsyNIRISSSNPySTVTM    |
| P35658   | NU214_HUMAN Nuclear pore complex protein Nup214                  | PsGRsAQGSSSPVPsMVQK    |
| P35659   | DEK_HUMAN Protein DEK                                            | CPEILsDESSSDEDEKKNK    |
| P35908   | K22E_HUMAN Keratin, type II cytoskeletal 2 epidermal             | FGSGGRGSSSGGYSSGs      |
| P35908   | K22E_HUMAN Keratin, type II cytoskeletal 2 epidermal             | sGGGsRGGSSSGGYGsGG     |
| P36915   | GNL1_HUMAN Guanine nucleotide-binding protein-like 1             | RGLQDGLRSSSNsRSGSRE    |
| P36915   | GNL1_HUMAN Guanine nucleotide-binding protein-like 1             | EEEEEEELSSSCEEEGEED    |
| P38159   | RBMX_HUMAN RNA-binding motif protein, X chromosome               | GysMNFNMSSSRGPLVKR     |
| P38159   | RBMX_HUMAN RNA-binding motif protein, X chromosome               | ytyRDyGHSSSRDDyPsRG    |
| P38159   | RBMX_HUMAN RNA-binding motif protein, X chromosome               | GssRyDDySSSRDyGGsR     |
| P38159   | RBMX_HUMAN RNA-binding motif protein, X chromosome               | yGGsRDsYSSSRsDLySSG    |
| P42167   | LAP2B_HUMAN Lamina-associated polypeptide 2, isoforms beta/gamma | sstPLPtISSSAENtRQNG    |

|          |                                                             |                      |
|----------|-------------------------------------------------------------|----------------------|
| P42568   | AF9_HUMAN Protein AF-9                                      | NRSIHTSSSSSSSSSSSSSS |
| P42568   | AF9_HUMAN Protein AF-9                                      | SSSSSSSSSSSSSSSSSSSS |
| P42568   | AF9_HUMAN Protein AF-9                                      | SSSSSSSSSSSSSSSSSSSS |
| P42568   | AF9_HUMAN Protein AF-9                                      | SSSSSSSSSSSSSSSSSSSS |
| P42568   | AF9_HUMAN Protein AF-9                                      | EQPSPASSSSSSSSSFTPSQ |
| P42694   | HELZ_HUMAN Probable helicase with zinc finger domain        | HPLSSRtVSSSSLPsLEEYE |
| P42694   | HELZ_HUMAN Probable helicase with zinc finger domain        | RPLyQRRISSSSVQPCSEEV |
| P42858   | HD_HUMAN Huntingtin                                         | DsEsRsDVSSSALTASVKD  |
| P43355   | MAGA1_HUMAN Melanoma-associated antigen 1                   | RQRQPSEGSSSREEEGPST  |
| P43358   | MAGA4_HUMAN Melanoma-associated antigen 4                   | CWRQPNEGSSSQEEEGPSt  |
| P43363   | MAGAA_HUMAN Melanoma-associated antigen 10                  | FPSSFPSSSSSSSSSCYPLI |
| P45973   | CBX5_HUMAN Chromobox protein homolog 5                      | KKTKRtADSSSEDEEEyVV  |
| P46100   | ATRX_HUMAN Transcriptional regulator ATRX                   | EnsKEEGtSSSEKsKSsGS  |
| P46100   | ATRX_HUMAN Transcriptional regulator ATRX                   | EVSRRMSHSSSDtDINEIH  |
| P46100   | ATRX_HUMAN Transcriptional regulator ATRX                   | IKMEQQYESSSDGTEKLPE  |
| P46100   | ATRX_HUMAN Transcriptional regulator ATRX                   | RRIKVQEDSSSENKsNsEE  |
| P46100   | ATRX_HUMAN Transcriptional regulator ATRX                   | KLEESKAtSSSNPssPAPD  |
| P46531   | NOTC1_HUMAN Neurogenic locus notch homolog protein 1        | sPEsPDQWSSSSPHSNVSDW |
| P46821   | MAP1B_HUMAN Microtubule-associated protein 1B               | KEKtAtCHSSSSPPIDAAsA |
| P47710   | CASA1_HUMAN Alpha-S1-casein                                 | PEKMESsISSSEEMSLSKC  |
| P48431   | SOX2_HUMAN Transcription factor SOX-2                       | GSVVKsEAsssPPVVTSSS  |
| P48553   | TPC10_HUMAN Trafficking protein particle complex subunit 10 | HMLLRQESSSLEMPSGVA   |
| P48634-2 | PRC2A_HUMAN Isoform 2 of Protein PRRC2A                     | AWRQRRKQSSSEIsLAVER  |
| P48634-2 | PRC2A_HUMAN Isoform 2 of Protein PRRC2A                     | RERsDsGGSSSEPFDRHAP  |
| P48681   | NEST_HUMAN Nestin                                           | sVGsLQALSSSQRGEFLES  |
| P48730   | KC1D_HUMAN Casein kinase I isoform delta                    | HRGAPVNISSSDLtGRQDT  |
| P49023-2 | PAXI_HUMAN Isoform Alpha of Paxillin                        | RFIHQQPQSSSPVyGssAK  |
| P49023-2 | PAXI_HUMAN Isoform Alpha of Paxillin                        | FMAQGKtGSSPPGGPPKP   |
| P49023   | PAXI_HUMAN Paxillin                                         | RFIHQQPQSSSPVyGssAK  |
| P49321   | NASP_HUMAN Nuclear autoantigenic sperm protein              | sRKPtDGAsssNCVTDIsh  |
| P49585   | PCY1A_HUMAN Choline-phosphate cytidyltransferase A          | AIspKQsPSSSPtRERsPs  |
| P49674   | KC1E_HUMAN Casein kinase I isoform epsilon                  | HRGAPANVSSSDLtGRQEV  |
| P49768   | PSN1_HUMAN Presenilin-1                                     | sRAAVQELSSSILAGEDPE  |
| P49790   | NU153_HUMAN Nuclear pore complex protein Nup153             | GSNGKNVfSSSGtsFsGRK  |
| P49792   | RBP2_HUMAN E3 SUMO-protein ligase RanBP2                    | EDALDDsVSSSVHAsPLAs  |

|          |                                                                                        |                          |
|----------|----------------------------------------------------------------------------------------|--------------------------|
| P49798-3 | RGS4_HUMAN Isoform 3 of Regulator of G-protein signaling 4                             | KYAQSRsHsssCRISFLLA      |
| P49815   | TSC2_HUMAN Tuberin                                                                     | QPsQPLsKssssPELQtLQD     |
| P50402   | EMD_HUMAN Emerin                                                                       | QRRRLsPPsssaAssysFs      |
| P50402   | EMD_HUMAN Emerin                                                                       | QVHDDLLsssEEECKDRE       |
| P50548   | ERF_HUMAN ETS domain-containing transcription factor ERF                               | PVPSSASSssssSSSPFKFK     |
| P50552   | VASP_HUMAN Vasodilator-stimulated phosphoprotein                                       | sTtLPRMKssssVttSEtQP     |
| P51116   | FXR2_HUMAN Fragile X mental retardation syndrome-related protein 2                     | KAGystDEsssSsLHATRT      |
| P51685   | CCR8_HUMAN C-C chemokine receptor type 8                                               | MPREsCEKsssCQQHSSRS      |
| P51811   | XK_HUMAN Membrane transport protein XK                                                 | SRDRDEtPssssKtSPEPGQ     |
| P51957   | NEK4_HUMAN Serine/threonine-protein kinase Nek4                                        | LKQSQEEMssssGPsvRKAs     |
| P53999   | TCP4_HUMAN Activated RNA polymerase II transcriptional coactivator p15                 | MPKsKELVssssssGsDsDsEV   |
| P53999   | TCP4_HUMAN Activated RNA polymerase II transcriptional coactivator p15                 | RALsSsKQssssRDDNMFQI     |
| P54198   | HIRA_HUMAN Protein HIRA                                                                | LRPRDLLEsssDsDEKVPL      |
| P54259   | ATN1_HUMAN Atrophin-1                                                                  | SSSAAASSssssSSSSASPF     |
| P54296   | MYOM2_HUMAN Myomesin-2                                                                 | WCHKDAKIsssEHMRIGGS      |
| P55085   | PAR2_HUMAN Proteinase-activated receptor 2                                             | TsKKHsRKsssysssstTV      |
| P55085   | PAR2_HUMAN Proteinase-activated receptor 2                                             | HsRKsssysssstTVKTSy-     |
| P55198   | AF17_HUMAN Protein AF-17                                                               | SSFTSASSssssSSSSSGGP     |
| P56181-2 | NDUV3_HUMAN Isoform 2 of NADH dehydrogenase [ubiquinone] flavoprotein 3, mitochondrial | RKVTSPsSssssssssDsEsDDEA |
| P56975   | NRG3_HUMAN Pro-neuregulin-3, membrane-bound isoform                                    | PFQDAASSssssSSSATTTT     |
| P57682   | KLF3_HUMAN Krueppel-like factor 3                                                      | AsPGLsMPsssPPIKKysP      |
| P61073   | CXCR4_HUMAN C-X-C chemokine receptor type 4                                            | ssVstEsEsssFHss----      |
| P61247   | RS3A_HUMAN 40S ribosomal protein S3a                                                   | LMELHGEGsssGKAtGDEt      |
| P62633   | CNBP_HUMAN Cellular nucleic acid-binding protein                                       | SDRGFQFVsssLPDICYRC      |
| P62736   | ACTA_HUMAN Actin, aortic smooth muscle                                                 | NEMATAASsssLEKsyELP      |
| P63218   | GBG5_HUMAN Guanine nucleotide-binding protein G(I)/G(S)/G(O) subunit gamma-5           | -----MsGsssVAAMKKVV      |
| P63267   | ACTH_HUMAN Actin, gamma-enteric smooth muscle                                          | NEMATAASsssLEKsyELP      |
| P67870   | CSK2B_HUMAN Casein kinase II subunit beta                                              | -----MsssEEVsWISW        |
| P68032   | ACTC_HUMAN Actin, alpha cardiac muscle 1                                               | NEMATAASsssLEKsyELP      |
| P68133   | ACTS_HUMAN Actin, alpha skeletal muscle                                                | NEMATAASsssLEKsyELP      |
| P78424   | PO6F2_HUMAN POU domain, class 6, transcription factor 2                                | SPVRQASSssssSSSSSALS     |



|          |                                                                                                          |                      |
|----------|----------------------------------------------------------------------------------------------------------|----------------------|
| P78426   | NKX61_HUMAN Homeobox protein Nkx-6.1                                                                     | LPAGPPSSssssSSSSSPSP |
| P78559   | MAP1A_HUMAN Microtubule-associated protein 1A                                                            | LEEEQsQGsssysDWVKNL  |
| P84550   | SKOR1_HUMAN SKI family transcriptional corepressor 1                                                     | QLGPGREGssssPNsKQELQ |
| P98082   | DAB2_HUMAN Disabled homolog 2                                                                            | sPDQKKENssssSstPLsNG |
| Q00005-2 | 2ABB_HUMAN Isoform 2 of Serine/threonine-protein phosphatase 2A 55 kDa regulatory subunit B beta isoform | FRPPNTILsSSCHTEADII  |
| Q00839   | HNRPU_HUMAN Heterogeneous nuclear ribonucleoprotein U                                                    | -----MssSPVNVKCLK    |
| Q01831   | XPC_HUMAN DNA repair protein complementing XP-C cells                                                    | GRKKRSKPssSEDEGPGD   |
| Q01850   | CDR2_HUMAN Cerebellar degeneration-related protein 2                                                     | SHRKPLKRsssetILSSLA  |
| Q01860   | PO5F1_HUMAN POU domain, class 5, transcription factor 1                                                  | NRRQKGKRssDyAQREDF   |
| Q02383   | SEMG2_HUMAN Semenogelin-2                                                                                | KENKI syQssstEERHLNC |
| Q02383   | SEMG2_HUMAN Semenogelin-2                                                                                | KENKI syQssstEERRLNS |
| Q02446   | SP4_HUMAN Transcription factor Sp4                                                                       | NVSQPASSssSSsNNGsA   |
| Q02952   | AKA12_HUMAN A-kinase anchor protein 12                                                                   | SKKRARRGssDEEGGPKA   |
| Q03111   | ENL_HUMAN Protein ENL                                                                                    | SEEsDEDDssGEEAAGKT   |
| Q03164   | KMT2A_HUMAN Histone-lysine N-methyltransferase 2A                                                        | ASSSASSssSSASSGP     |
| Q03252   | LMNB2_HUMAN Lamin-B2                                                                                     | RVtVsRAtssssGsLsAtGR |
| Q04724   | TLE1_HUMAN Transducin-like enhancer protein 1                                                            | NRLKKDAssPAsTAsSA    |
| Q05823   | RN5A_HUMAN 2-5A-dependent ribonuclease                                                                   | NNPQEGPTssGRRAAVED   |
| Q06190   | P2R3A_HUMAN Serine/threonine-protein phosphatase 2A regulatory subunit B" subunit alpha                  | APSFGLLRssVEEKPLsH   |
| Q06190   | P2R3A_HUMAN Serine/threonine-protein phosphatase 2A regulatory subunit B" subunit alpha                  | GDQRDFtNssQEEIDKLL   |
| Q06416   | P5F1B_HUMAN Putative POU domain, class 5, transcription factor 1B                                        | NRRQKGKRssDyAQREDF   |
| Q07960   | RHG01_HUMAN Rho GTPase-activating protein 1                                                              | FPKsDDsKssPELVTHLK   |
| Q08945   | SSRP1_HUMAN FACT complex subunit SSRP1                                                                   | KEFVssDEssGENKsKKK   |
| Q08999   | RBL2_HUMAN Retinoblastoma-like protein 2                                                                 | RDSsPVMRssstLPVPQPs  |
| Q08AD1   | CAMP2_HUMAN Calmodulin-regulated spectrin-associated protein 2                                           | sAsGGIRRssMsYVDGFI   |
| Q09666   | AHNK_HUMAN Neuroblast differentiation-associated protein AHNK                                            | LAsKsRLssssNDsGNKVG  |
| Q0JRZ9   | FCHO2_HUMAN FCH domain only protein 2                                                                    | AAPLARAEsssISSsASLS  |
| Q0VF96   | CGNL1_HUMAN Cingulin-like protein 1                                                                      | LDGARSRRsssttPTsANs  |
| Q12772   | SRBP2_HUMAN Sterol regulatory element-binding protein 2                                                  | SSSNNGRGssGAVDPSVQ   |
| Q12791   | KCMA1_HUMAN Calcium-activated potassium channel subunit alpha-1                                          | HLSLDASSssSSSSSS     |
| Q12791   | KCMA1_HUMAN Calcium-activated potassium channel subunit alpha-1                                          | ssSSSSSSSSSSSSSV     |
| Q12797   | ASPH_HUMAN Aspartyl/asparaginyl beta-hydroxylase                                                         | GsGstsAGssPGARREtK   |

|          |                                                                                            |                          |
|----------|--------------------------------------------------------------------------------------------|--------------------------|
| Q12849   | GRSF1_HUMAN G-rich sequence factor 1                                                       | PVRITMEYsssGKATGEAD      |
| Q12872   | SFSWA_HUMAN Splicing factor, suppressor of white-apricot homolog                           | GSGGKKEAsssKTVPDGKL      |
| Q12888   | TP53B_HUMAN Tumor suppressor p53-binding protein 1                                         | GKKDGMHsssLTVECSKT       |
| Q12888   | TP53B_HUMAN Tumor suppressor p53-binding protein 1                                         | HasQsFCEsssETPFHFTL      |
| Q12888   | TP53B_HUMAN Tumor suppressor p53-binding protein 1                                         | ssPatPtAssssttPTRKit     |
| Q12929   | EPS8_HUMAN Epidermal growth factor receptor kinase substrate 8                             | PANiTRQNssssDsGGsIVR     |
| Q13029   | PRDM2_HUMAN PR domain zinc finger protein 2                                                | PGPPTLSSssssSSSSSFS      |
| Q13136   | LIPA1_HUMAN Liprin-alpha-1                                                                 | PyPAssLAsssPPGsGRst      |
| Q13216   | ERCC8_HUMAN DNA excision repair protein ERCC-8                                             | NPAFEDAWsssDEEG----      |
| Q13243   | SRSF5_HUMAN Serine/arginine-rich splicing factor 5                                         | PEKSQKRGsssRsKsPAsV      |
| Q13283   | G3BP1_HUMAN Ras GTPase-activating protein-binding protein 1                                | tAPEDAQKsssPAPADIAQ      |
| Q13330   | MTA1_HUMAN Metastasis-associated protein MTA1                                              | TFARALDCsssVRQPSLHM      |
| Q13371   | PHLP_HUMAN Phosducin-like protein                                                          | GEKLQYyyssseDEDsDHE      |
| Q13415   | ORC1_HUMAN Origin recognition complex subunit 1                                            | LPAAEIsDsssDEEEASTP      |
| Q13416   | ORC2_HUMAN Origin recognition complex subunit 2                                            | VEEyFEAHsssKVLtSDRt      |
| Q13427   | PPIG_HUMAN Peptidyl-prolyl cis-trans isomerase G                                           | EKKRHKsSssssssssDsDsssDS |
| Q13427   | PPIG_HUMAN Peptidyl-prolyl cis-trans isomerase G                                           | ssssDsDsssDSQsSsDS       |
| Q13428   | TCOF_HUMAN Treacle protein                                                                 | GKREEDsQssseEsDsEEE      |
| Q13428   | TCOF_HUMAN Treacle protein                                                                 | GKQEEDsRsssEEsDsDRE      |
| Q13428   | TCOF_HUMAN Treacle protein                                                                 | AGKQDDsGsssEEsDSDGE      |
| Q13428   | TCOF_HUMAN Treacle protein                                                                 | RASESTARsssEseDEDVI      |
| Q13439-5 | GOGA4_HUMAN Isoform 5 of Golgin subfamily A member 4                                       | ARLMsWLRsss-----         |
| Q13439   | GOGA4_HUMAN Golgin subfamily A member 4                                                    | PIKESLFRsssKEsLVRts      |
| Q13472   | TOP3A_HUMAN DNA topoisomerase 3-alpha                                                      | ARsKRPRAsssDMGstAKK      |
| Q13501   | SQSTM_HUMAN Sequestosome-1                                                                 | RLtPVsPEssstEEKsSsQ      |
| Q13516   | OLIG2_HUMAN Oligodendrocyte transcription factor 2                                         | FKsSSsSTsssTSSAAASS      |
| Q13523   | PRP4B_HUMAN Serine/threonine-protein kinase PRP4 homolog                                   | NGNRSStRsssTKGKLELV      |
| Q13523   | PRP4B_HUMAN Serine/threonine-protein kinase PRP4 homolog                                   | EGMKVEQEsssDDNLEDFD      |
| Q13535   | ATR_HUMAN Serine/threonine-protein kinase ATR                                              | IsPKRRRLsssLNPsKRAP      |
| Q13555-5 | KCC2G_HUMAN Isoform 5 of Calcium/calmodulin-dependent protein kinase type II subunit gamma | DGGVKKRKsssVHLMEPQT      |
| Q13620-1 | CUL4B_HUMAN Isoform 2 of Cullin-4B                                                         | KKRKLNsSssssNssNERED     |
| Q13620-1 | CUL4B_HUMAN Isoform 2 of Cullin-4B                                                         | REDFDstSsssstPPLQPRD     |
| Q13620-1 | CUL4B_HUMAN Isoform 2 of Cullin-4B                                                         | AKMAEESsSSsPtAAT         |
| Q13620   | CUL4B_HUMAN Cullin-4B                                                                      | FDAKMAEEssssssssPtAATsQQ |

|          |                                                                                            |                         |
|----------|--------------------------------------------------------------------------------------------|-------------------------|
| Q14005   | IL16_HUMAN Pro-interleukin-16                                                              | HLGSHIRAsSSSSSIRQRIs    |
| Q14126   | DSG2_HUMAN Desmoglein-2                                                                    | AKEAtMKGsssAsIVKGQH     |
| Q14135   | VGLL4_HUMAN Transcription cofactor vestigial-like protein 4                                | IKAAKDGAsSSPEsAsRRG     |
| Q14153   | FA53B_HUMAN Protein FAM53B                                                                 | NGFSTMQRsssFsLPSRAN     |
| Q14157   | UBP2L_HUMAN Ubiquitin-associated protein 2-like                                            | sPGssDNQsssPQPAQQKL     |
| Q14157   | UBP2L_HUMAN Ubiquitin-associated protein 2-like                                            | sPGssDNQsssPQPAQQKL     |
| Q14161   | GIT2_HUMAN ARF GTPase-activating protein GIT2                                              | GRSALVTSsssLPsFPsTL     |
| Q14244   | MAP7_HUMAN Ensconsin                                                                       | DPVISKRLssssAtLLNsPD    |
| Q14432   | PDE3A_HUMAN cGMP-inhibited 3',5'-cyclic phosphodiesterase A                                | PVFKRRRRsssVVsAEMsG     |
| Q14493   | SLBP_HUMAN Histone RNA hairpin-binding protein                                             | NDFGRERKsssGssDsKEs     |
| Q14493   | SLBP_HUMAN Histone RNA hairpin-binding protein                                             | NDFGRERKsssGssDsKEs     |
| Q14494   | NF2L1_HUMAN Nuclear factor erythroid 2-related factor 1                                    | LSSSEGSSssssSSSSSSSS    |
| Q14511   | CASL_HUMAN Enhancer of filamentation 1                                                     | SKEQAPDCsssDGsERSWM     |
| Q14573   | ITPR3_HUMAN Inositol 1,4,5-trisphosphate receptor type 3                                   | VAsFsIPGsssRYsLGPsL     |
| Q14644   | RASA3_HUMAN Ras GTPase-activating protein 3                                                | VKNFLDLIsssGRRDPKSV     |
| Q14671   | PUM1_HUMAN Pumilio homolog 1                                                               | FsPsstLfssssRLRYGMsD    |
| Q14738   | 2A5D_HUMAN Serine/threonine-protein phosphatase 2A 56 kDa regulatory subunit delta isoform | IVKKERRQsssRFNLsKNR     |
| Q14839   | CHD4_HUMAN Chromodomain-helicase-DNA-binding protein 4                                     | GFGsKRRRsssEDDDLdVE     |
| Q14978   | NOLC1_HUMAN Nucleolar and coiled-body phosphoprotein 1                                     | AKKAKKKAsssDsEDsEE      |
| Q14978   | NOLC1_HUMAN Nucleolar and coiled-body phosphoprotein 1                                     | KIANGKAAssssssssSSDDsEE |
| Q14978   | NOLC1_HUMAN Nucleolar and coiled-body phosphoprotein 1                                     | RkssSsEDsssDEEEEQKK     |
| Q14978   | NOLC1_HUMAN Nucleolar and coiled-body phosphoprotein 1                                     | EDSSDESsssEEEKPPPT      |
| Q14978   | NOLC1_HUMAN Nucleolar and coiled-body phosphoprotein 1                                     | PPAKKAAEsssDSsDSsS      |
| Q14C86   | GAPD1_HUMAN GTPase-activating protein and VPS9 domain-containing protein 1                 | TsLVAAPHsssssPsKDssRG   |
| Q15047   | SETB1_HUMAN Histone-lysine N-methyltransferase SETDB1                                      | KLGLQYRDsssEDESSRPT     |
| Q15052   | ARHG6_HUMAN Rho guanine nucleotide exchange factor 6                                       | LSERPCGRsssLsAANTsQ     |
| Q15059   | BRD3_HUMAN Bromodomain-containing protein 3                                                | LQDVsgQLsssKKPARKEK     |
| Q15059   | BRD3_HUMAN Bromodomain-containing protein 3                                                | GGPSRLsSsssEsGsSSSs     |
| Q15059   | BRD3_HUMAN Bromodomain-containing protein 3                                                | sGSSSSsGsssDssDsE--     |
| Q15124   | PGM5_HUMAN Phosphoglucomutase-like protein 5                                               | ASRLIFRLssssGVRATLRL    |
| Q15149-2 | PLEC_HUMAN Isoform 2 of Plectin                                                            | NAGGFRsRsssVGssssYP     |
| Q15149-2 | PLEC_HUMAN Isoform 2 of Plectin                                                            | RsRsssVGssssYPIsPAVs    |
| Q15149-4 | PLEC_HUMAN Isoform 4 of Plectin                                                            | NAGGFRsRsssVGssssYP     |

|          |                                                                                              |                       |
|----------|----------------------------------------------------------------------------------------------|-----------------------|
| Q15149-4 | PLEC_HUMAN Isoform 4 of Plectin                                                              | RsRsssVGssssYPIsPAVs  |
| Q15149-6 | PLEC_HUMAN Isoform 6 of Plectin                                                              | NAGGFRsRsssVGssssYP   |
| Q15149-6 | PLEC_HUMAN Isoform 6 of Plectin                                                              | RsRsssVGssssYPIsPAVs  |
| Q15149-9 | PLEC_HUMAN Isoform 9 of Plectin                                                              | NAGGFRsRsssVGssssYP   |
| Q15149-9 | PLEC_HUMAN Isoform 9 of Plectin                                                              | RsRsssVGssssYPIsPAVs  |
| Q15149   | PLEC_HUMAN Plectin                                                                           | NAGGFRsRsssVGssssYP   |
| Q15149   | PLEC_HUMAN Plectin                                                                           | RsRsssVGssssYPIsPAVs  |
| Q15154   | PCM1_HUMAN Pericentriolar material 1 protein                                                 | LRDQHLNNSsssPQRsVDQR  |
| Q15154   | PCM1_HUMAN Pericentriolar material 1 protein                                                 | MAFPKPFESsssIGA EKPRN |
| Q15287   | RNPS1_HUMAN RNA-binding protein with serine-rich domain 1                                    | TrsRSsstsssGsststGs   |
| Q15287   | RNPS1_HUMAN RNA-binding protein with serine-rich domain 1                                    | sGsststGsssGssSssAs   |
| Q15329   | E2F5_HUMAN Transcription factor E2F5                                                         | HVLLINKEssssKPVVFPVP  |
| Q15349   | KS6A2_HUMAN Ribosomal protein S6 kinase alpha-2                                              | LRRKSRSKsssLsRLEEEG   |
| Q15365   | PCBP1_HUMAN Poly(rC)-binding protein 1                                                       | GtGFAGIDsssPEVKGyWA   |
| Q15366   | PCBP2_HUMAN Poly(rC)-binding protein 2                                                       | tIPyRKPsssPVI FAGGQ   |
| Q15424   | SAFB1_HUMAN Scaffold attachment factor B1                                                    | EtINNLDtsssDFtILQEI   |
| Q15464   | SHB_HUMAN SH2 domain-containing adapter protein B                                            | SGsPHLYRsssERRPATPA   |
| Q15517   | CDSN_HUMAN Corneodesmosin                                                                    | SGFSSYSGsssSGSSI ssa  |
| Q15572   | TAF1C_HUMAN TATA box-binding protein-associated factor RNA polymerase I subunit C            | sQQHtPVLsssQPLRKKPR   |
| Q15648   | MED1_HUMAN Mediator of RNA polymerase II transcription subunit 1                             | ssPLERQNSsssGsPRMEIC  |
| Q15648   | MED1_HUMAN Mediator of RNA polymerase II transcription subunit 1                             | SIQRMVRLsssDsIGPDVt   |
| Q15772   | SPEG_HUMAN Striated muscle preferentially expressed protein kinase                           | LENRGLQKsssFSQGEAEP   |
| Q16204   | CCDC6_HUMAN Coiled-coil domain-containing protein 6                                          | PIPytPsPsssRPIsPGLs   |
| Q16254   | E2F4_HUMAN Transcription factor E2F4                                                         | SSALLDSSsssSSSSSSSN   |
| Q16537   | 2A5E_HUMAN Serine/threonine-protein phosphatase 2A 56 kDa regulatory subunit epsilon isoform | KARQKRsqsssQFRsQGKP   |
| Q16644   | MAPK3_HUMAN MAP kinase-activated protein kinase 3                                            | KRRKKQAGsssAsQGCNNQ   |
| Q17RH7   | TPRXL_HUMAN Putative protein TPRXL                                                           | SSTSSPSSsssSSSSSPSS   |
| Q17RH7   | TPRXL_HUMAN Putative protein TPRXL                                                           | SPSSSNSSsssSSSPSSss   |
| Q17RH7   | TPRXL_HUMAN Putative protein TPRXL                                                           | ssSSSPSSsssSSSPSSS    |
| Q17RH7   | TPRXL_HUMAN Putative protein TPRXL                                                           | SSSSPSSsssSSSPSSS     |
| Q17RH7   | TPRXL_HUMAN Putative protein TPRXL                                                           | SSSSPSSsssSSSSSP      |
| Q2M2Z5   | KIZ_HUMAN Centrosomal protein kizuna                                                         | KIASEAsFsssEGSPLSRH   |
| Q2PPJ7   | RGPA2_HUMAN Ral GTPase-activating protein subunit alpha-2                                    | GQQQVLRsstSDIPEPL     |

|        |                                                                             |                       |
|--------|-----------------------------------------------------------------------------|-----------------------|
| Q2PPJ7 | RGPA2_HUMAN Ral GTPase-activating protein subunit alpha-2                   | GitILVRRsssPAELDLKD   |
| Q2TBE0 | C19L2_HUMAN CWF19-like protein 2                                            | KGRKFEPLssssALVAQGsL  |
| Q2WGJ9 | FR1L6_HUMAN Fer-1-like protein 6                                            | CIYKSPQDsssEDsGQLRI   |
| Q32M45 | ANO4_HUMAN Anoctamin-4                                                      | -----MEAsssGItnGKTK   |
| Q32MH5 | F214A_HUMAN Protein FAM214A                                                 | TYQETQNKsssLSTSSILs   |
| Q3L8U1 | CHD9_HUMAN Chromodomain-helicase-DNA-binding protein 9                      | ssCSSRSSsssssSsSCsHsR |
| Q3L8U1 | CHD9_HUMAN Chromodomain-helicase-DNA-binding protein 9                      | SSSSSTSSsssssSSSSEESD |
| Q4G0J3 | LARP7_HUMAN La-related protein 7                                            | VRtGKRKRsssEDAESLAP   |
| Q4G0X9 | CCD40_HUMAN Coiled-coil domain-containing protein 40                        | LEETQRNVsssLLEKQEKL   |
| Q4KMP7 | TB10B_HUMAN TBC1 domain family member 10B                                   | RQQPPLGPsssLLsLPGLK   |
| Q4KWH8 | PLCH1_HUMAN 1-phosphatidylinositol 4,5-bisphosphate phosphodiesterase eta-1 | FLNFNKKLsssssALLHKDTS |
| Q4V328 | GRAP1_HUMAN GRIP1-associated protein 1                                      | SAVPARsLsssPQAQPPRP   |
| Q53F19 | CQ085_HUMAN Uncharacterized protein C17orf85                                | NsMRADsVsssNIKNRIGN   |
| Q53QZ3 | RHG15_HUMAN Rho GTPase-activating protein 15                                | LELFKIQRssstELLSHyD   |
| Q53TX8 | Q53TX8_HUMAN Putative uncharacterized protein MAP4K4 (Fragment)             | SGERFRVRsssKSEGSpsQ   |
| Q56P03 | EAPP_HUMAN E2F-associated phosphoprotein                                    | PsDEEPALsssEDEVDVLL   |
| Q56P03 | EAPP_HUMAN E2F-associated phosphoprotein                                    | ECLtGEsEsssEDEFEKEM   |
| Q58F21 | BRDT_HUMAN Bromodomain testis-specific protein                              | VSRLsEsSsssssSSSESESS |
| Q5BKY9 | F133B_HUMAN Protein FAM133B                                                 | sGRysSsSsssDsSsssD    |
| Q5BKY9 | F133B_HUMAN Protein FAM133B                                                 | SssssDsSsssDSEDEDKK   |
| Q5H9R7 | PP6R3_HUMAN Serine/threonine-protein phosphatase 6 regulatory subunit 3     | LVTTCIHsssDDEIDFKE    |
| Q5JQC9 | AKAP4_HUMAN A-kinase anchor protein 4                                       | DKDyKDAAsssseGNLNLGS  |
| Q5JRA6 | MIA3_HUMAN Melanoma inhibitory activity protein 3                           | SGtATMMNsssRGssPTRV   |
| Q5JSH3 | WDR44_HUMAN WD repeat-containing protein 44                                 | FHTDQDDPsssDDEGMPyt   |
| Q5JTV8 | TOIP1_HUMAN Torsin-1A-interacting protein 1                                 | EsGDkTRsssQyIESFWQ    |
| Q5S007 | LRRK2_HUMAN Leucine-rich repeat serine/threonine-protein kinase 2           | LFNIKARAsssPVILVGtH   |
| Q5SNT6 | FA21B_HUMAN WASH complex subunit FAM21B                                     | AGAsVKEEsssssKPGKKIPA |
| Q5SXM2 | SNPC4_HUMAN snRNA-activating protein complex subunit 4                      | SSsGSsGGsssssSsSEEDep |
| Q5SYE7 | NHSL1_HUMAN NHS-like protein 1                                              | ETDQKCsLsssEERFIsI    |
| Q5SZQ8 | CELF3_HUMAN CUGBP Elav-like family member 3                                 | SSRtLPGAsssLVVKFADT   |
| Q5T0W9 | FA83B_HUMAN Protein FAM83B                                                  | APAFyRLCsssDTLVsEGE   |
| Q5T1M5 | FKB15_HUMAN FK506-binding protein 15                                        | QQEQEKEEsssEEEEEKAE   |
| Q5T200 | ZC3HD_HUMAN Zinc finger CCCH domain-containing protein 13                   | sPIssRHHsssssQsGSsIQR |



|          |                                                                                            |                                     |
|----------|--------------------------------------------------------------------------------------------|-------------------------------------|
| Q5T2W1   | NHRF3_HUMAN Na(+)/H(+) exchange regulatory cofactor NHE-RF3                                | RAHstAsHsssNsEDTEM-                 |
| Q5T5C0-2 | STXB5_HUMAN Isoform 2 of Syntaxin-binding protein 5                                        | DNSFSRSRsssVtsIDKES                 |
| Q5T5C0   | STXB5_HUMAN Syntaxin-binding protein 5                                                     | DNSFsRsRsssVtsIDKES                 |
| Q5T5D7   | ZN684_HUMAN Zinc finger protein 684                                                        | ECGKTFRysssLyKHSRFH                 |
| Q5T5U3   | RHG21_HUMAN Rho GTPase-activating protein 21                                               | EDSGSRKDsssEVFsDAAK                 |
| Q5T5U3   | RHG21_HUMAN Rho GTPase-activating protein 21                                               | KPKEKAQPsssEDELDNVF                 |
| Q5T8P6   | RBM26_HUMAN RNA-binding protein 26                                                         | RLNHsPPQsssRYRENRSR                 |
| Q5TC82   | RC3H1_HUMAN Roquin-1                                                                       | KPGKIDHLsssAPGsPPDL                 |
| Q5TCZ1   | SPD2A_HUMAN SH3 and PX domain-containing protein 2A                                        | INTTCCSSssssSSSLSKTS                |
| Q5THJ4   | VP13D_HUMAN Vacuolar protein sorting-associated protein 13D                                | VTPSRHRNsssEsAIVPKT                 |
| Q5TIE3   | VW5B1_HUMAN von Willebrand factor A domain-containing protein 5B1                          | EFIFLIDRsssMsGIsMHR                 |
| Q5TKA1   | LIN9_HUMAN Protein lin-9 homolog                                                           | ELDQLPDEsssAKALVSLK                 |
| Q5VT52   | RPRD2_HUMAN Regulation of nuclear pre-mRNA domain-containing protein 2                     | SsENCURLsssPGLFGAFS                 |
| Q5VT52   | RPRD2_HUMAN Regulation of nuclear pre-mRNA domain-containing protein 2                     | HYRIETRVsssCLDLPDST                 |
| Q5VU43   | MYOME_HUMAN Myomegalin                                                                     | GRRGSTLAsssERKPLENQ                 |
| Q5VUA4   | ZN318_HUMAN Zinc finger protein 318                                                        | sPPPPPsGsssRtPARRPR                 |
| Q5VV67   | PPRC1_HUMAN Peroxisome proliferator-activated receptor gamma coactivator-related protein 1 | NRTSEAsSssssSSssRSRS                |
| Q5VV67   | PPRC1_HUMAN Peroxisome proliferator-activated receptor gamma coactivator-related protein 1 | SSGRsRRCssssssssssssssssssSssrsRSRs |
| Q5VWQ0   | RSBN1_HUMAN Round spermatid basic protein 1                                                | RGVKRQRRsssGGSQEKRG                 |
| Q5VWQ8   | DAB2P_HUMAN Disabled homolog 2-interacting protein                                         | PSTRLRQQsssKGDsPELK                 |
| Q5VYK3   | ECM29_HUMAN Proteasome-associated protein ECM29 homolog                                    | MssGQMAPsssNKSGETNP                 |
| Q5VZ18   | SHE_HUMAN SH2 domain-containing adapter protein E                                          | NGKSNYPSSssssSSSSSSAS               |
| Q5VZL5   | ZMYM4_HUMAN Zinc finger MYM-type protein 4                                                 | KCGGVEQAsssPRsDPLGs                 |
| Q63HK5   | TSH3_HUMAN Teashirt homolog 3                                                              | SEKNNGSSssssSSSSSCGS                |
| Q641Q2   | FA21A_HUMAN WASH complex subunit FAM21A                                                    | AGAsVKEEsssKPGKKIPA                 |
| Q66PJ3   | AR6P4_HUMAN ADP-ribosylation factor-like protein 6-interacting protein 4                   | QKARRRtRssssssssssssssssssSssssss   |
| Q66PJ3   | AR6P4_HUMAN ADP-ribosylation factor-like protein 6-interacting protein 4                   | ssssssSssssssSsDGRKKR               |
| Q68CZ2   | TENS3_HUMAN Tensin-3                                                                       | NGPGQRREsssAERQWVEs                 |

|          |                                                                           |                       |
|----------|---------------------------------------------------------------------------|-----------------------|
| Q68DN1   | CB016_HUMAN Uncharacterized protein C2orf16                               | SPSERSHRsssERRHRSPS   |
| Q68E01   | INT3_HUMAN Integrator complex subunit 3                                   | PNAEEEsGsssAsEEEDTK   |
| Q68EM7   | RHG17_HUMAN Rho GTPase-activating protein 17                              | QLsAPRRYsssLsPIQAPN   |
| Q6AHZ1   | Z518A_HUMAN Zinc finger protein 518A                                      | VYENPQREssssKTVVQQPI  |
| Q6AI08   | HEAT6_HUMAN HEAT repeat-containing protein 6                              | SSSSWKRVsssEsDFsDAE   |
| Q6DN90   | IQEC1_HUMAN IQ motif and SEC7 domain-containing protein 1                 | EGLKRSALsssLRDLSEAG   |
| Q6GYQ0   | RGPA1_HUMAN Ral GTPase-activating protein subunit alpha-1                 | sTLTEREPssssLCsIDEEH  |
| Q6GYQ0   | RGPA1_HUMAN Ral GTPase-activating protein subunit alpha-1                 | NEEQPLPRssstsDILEPF   |
| Q6IE81   | JADE1_HUMAN Protein Jade-1                                                | -MKRGRLPssssEDsDDNGs  |
| Q6IMN6   | CAPR2_HUMAN Caprin-2                                                      | QGFQSPPAssssSVTINTAP  |
| Q6IQ23   | PKHA7_HUMAN Pleckstrin homology domain-containing family A member 7       | KPGPKI IKsssKVHsFGKR  |
| Q6L8Q7   | PDE12_HUMAN 2',5'-phosphodiesterase 12                                    | sSLsPssPssWTETDVEE    |
| Q6NYC1   | JMJD6_HUMAN Bifunctional arginine demethylase and lysyl-hydroxylase JMJD6 | SDSSSDSSssssSSSSSDSDS |
| Q6NYC1   | JMJD6_HUMAN Bifunctional arginine demethylase and lysyl-hydroxylase JMJD6 | DDCVsKERsssR-----     |
| Q6P1L5   | F117B_HUMAN Protein FAM117B                                               | AGDKTRQPssssPSSIIRRt  |
| Q6P280   | ZN529_HUMAN Zinc finger protein 529                                       | ACGKVFRNsssLrRHQRiH   |
| Q6P2E9   | EDC4_HUMAN Enhancer of mRNA-decapping protein 4                           | sSSSSGSSssssSSSSSLTA  |
| Q6P597   | KLC3_HUMAN Kinesin light chain 3                                          | DAEQALRRsssLSKIRESI   |
| Q6PD62   | CTR9_HUMAN RNA polymerase-associated protein CTR9 homolog                 | KIKSKAIIsssDDsDEDK    |
| Q6PKG0-3 | LARP1_HUMAN Isoform 2 of La-related protein 1                             | HRPRtAsIsssPseGtPtV   |
| Q6PKG0   | LARP1_HUMAN La-related protein 1                                          | HRPRtAsIsssPseGtPtV   |
| Q6PKG0   | LARP1_HUMAN La-related protein 1                                          | GRKRCPsQsssRPAAMIsQ   |
| Q6PL18   | ATAD2_HUMAN ATPase family AAA domain-containing protein 2                 | KIACNGDAsssQIIHIsDE   |
| Q6Q0C0   | TRAF7_HUMAN E3 ubiquitin-protein ligase TRAF7                             | yKQHCRtPsssstLAYS PRD |
| Q6VN20   | RBP10_HUMAN Ran-binding protein 10                                        | HSKYPAPSSssssSSSSssss |
| Q6VN20   | RBP10_HUMAN Ran-binding protein 10                                        | ssssSSSSssssPSSVNYSE  |
| Q6VY07   | PACS1_HUMAN Phosphofurin acidic cluster sorting protein 1                 | yATWEVDRssssCVPRLFSL  |
| Q6VY07   | PACS1_HUMAN Phosphofurin acidic cluster sorting protein 1                 | PFEGMsQsssQteIGsLN    |
| Q6WCQ1   | MPRIP_HUMAN Myosin phosphatase Rho-interacting protein                    | AKVAVTSSssssSSSSSIps  |
| Q6WKZ4   | RFIP1_HUMAN Rab11 family-interacting protein 1                            | GEIKDssPssPspKGFRK    |
| Q6XPR3   | RPTN_HUMAN Repetin                                                        | QSERQsQDsssGKKVSHKS   |
| Q6ZMG9   | CERS6_HUMAN Ceramide synthase 6                                           | KDDRSDIEsssDEEDSEPP   |

|          |                                                                            |                        |
|----------|----------------------------------------------------------------------------|------------------------|
| Q6ZMU5   | TRI72_HUMAN Tripartite motif-containing protein 72                         | SAHPSLVVsssGRRVECSE    |
| Q6ZN04   | MEX3B_HUMAN RNA-binding protein MEX3B                                      | PSDTSGSSssssSSSSSSSS   |
| Q6ZN96   | Q6ZN96_HUMAN cDNA FLJ16308 fis, clone PUAEN2006335                         | NVHSRVRIsssTPVVEDTQ    |
| Q6ZNB6   | NFXL1_HUMAN NF-X1-type zinc finger protein NFXL1                           | RKLVEEQFssssEEGDEDFE   |
| Q6ZRS2   | SRCAP_HUMAN Helicase SRCAP                                                 | QGQGEsEGsssDEDGSRPL    |
| Q6ZRV2   | FA83H_HUMAN Protein FAM83H                                                 | --MARRsQsssQGDNPLAP    |
| Q6ZVD8   | PHLP2_HUMAN PH domain leucine-rich repeat-containing protein phosphatase 2 | TTTTTTSSssssSSSSSDLH   |
| Q6ZW76   | ANKS3_HUMAN Ankyrin repeat and SAM domain-containing protein 3             | sPEKYEDLsssDESCPAPQ    |
| Q71RC2   | LARP4_HUMAN La-related protein 4                                           | CKEYEVMysssCETTRNTT    |
| Q76FK4   | NOL8_HUMAN Nucleolar protein 8                                             | QEDPRLQDsssEEDVTEE     |
| Q76L83   | ASXL2_HUMAN Putative Polycomb group protein ASXL2                          | DCKNATGEsssSKEDDtDE    |
| Q7KZ85   | SPT6H_HUMAN Transcription elongation factor SPT6                           | PVPGItPSsssRtRtPAsI    |
| Q7LBC6   | KDM3B_HUMAN Lysine-specific demethylase 3B                                 | VSESLADDsssRDsFKQsL    |
| Q7Z2Z1   | TICRR_HUMAN Treslin                                                        | LRIKKIDPsssLEAEPLsK    |
| Q7Z309-3 | F122B_HUMAN Isoform 3 of Protein FAM122B                                   | SYGGTLRRsssAPLIHGLS    |
| Q7Z309-3 | F122B_HUMAN Isoform 3 of Protein FAM122B                                   | MSRHsLLLsssPNRIPSSR    |
| Q7Z309   | F122B_HUMAN Protein FAM122B                                                | sYGGTLRRsssAPLIHGLs    |
| Q7Z3E2   | CC186_HUMAN Coiled-coil domain-containing protein 186                      | EVssMGsRssssGsLNARss   |
| Q7Z3J3   | RGPD4_HUMAN RanBP2-like and GRIP domain-containing protein 4               | EDALDDsVssssVHAsPLAs   |
| Q7Z434   | MAVS_HUMAN Mitochondrial antiviral-signaling protein                       | VStGTsFSsssPGLASAGA    |
| Q7Z460   | CLAP1_HUMAN CLIP-associating protein 1                                     | NPAGAGsRsssPGKLLGsG    |
| Q7Z4S6   | KI21A_HUMAN Kinesin-like protein KIF21A                                    | AGKVTRKLsssDAPAQDtG    |
| Q7Z4V5   | HDGR2_HUMAN Hepatoma-derived growth factor-related protein 2               | PVAMARsAssssssSSsDsDVS |
| Q7Z4V5   | HDGR2_HUMAN Hepatoma-derived growth factor-related protein 2               | KGRGRGPPsssDsEPEAEL    |
| Q7Z589   | EMSY_HUMAN Protein EMSY                                                    | PRKRRRtNsssssPVVLKEVP  |
| Q7Z591   | AKNA_HUMAN AT-hook-containing transcription factor                         | EDKRDVDRsssQsWEEERL    |
| Q7Z591   | AKNA_HUMAN AT-hook-containing transcription factor                         | PPGRQRARsssVPREVLRL    |
| Q7Z5L9   | I2BP2_HUMAN Interferon regulatory factor 2-binding protein 2               | AHKRPAsVsssAAVEHEQR    |
| Q7Z6E9   | RBBP6_HUMAN E3 ubiquitin-protein ligase RBBP6                              | PPFLPEEPsssEEDDPIPD    |
| Q7Z6J9   | SEN54_HUMAN tRNA-splicing endonuclease subunit Sen54                       | DGDGKRKRsssPRsINKKA    |
| Q86SQ0   | PHLB2_HUMAN Pleckstrin homology-like domain family B member 2              | INLRTRKysssLSHMGAyS    |
| Q86TC9   | MYPN_HUMAN Myopalladin                                                     | QNKVMQENsssFSDLsERR    |
| Q86U86   | PB1_HUMAN Protein polybromo-1                                              | KRRRAtsPsssVsGDFDDG    |
| Q86UV5   | UBP48_HUMAN Ubiquitin carboxyl-terminal hydrolase 48                       | DSAPELVNsssETEEEDKEE   |

|        |                                                             |                       |
|--------|-------------------------------------------------------------|-----------------------|
| Q86UY5 | FA83A_HUMAN Protein FAM83A                                  | EAGPKGLDsssLQsGtyFP   |
| Q86V48 | LUZP1_HUMAN Leucine zipper protein 1                        | GALAssRRsssEGLsKGKK   |
| Q86VP3 | PACS2_HUMAN Phosphofurin acidic cluster sorting protein 2   | PYFEGLSHsssQtEIGSIH   |
| Q86VQ1 | GLC1I_HUMAN Glucocorticoid-induced transcript 1 protein     | --MSTAsSsssssSSSQTPHP |
| Q86VQ1 | GLC1I_HUMAN Glucocorticoid-induced transcript 1 protein     | APLPAHYRssstRsIDTQt   |
| Q86WB0 | NIPA_HUMAN Nuclear-interacting partner of ALK               | VsRtRsWDsssPVDREPEPE  |
| Q86WB0 | NIPA_HUMAN Nuclear-interacting partner of ALK               | KAKRARLCsssssDtssRsFF |
| Q86X02 | CDR2L_HUMAN Cerebellar degeneration-related protein 2-like  | CKDAFRLHsssLELGPRPL   |
| Q86X95 | CIR1_HUMAN Corepressor interacting with RBPJ 1              | KHKHKSSsssssSsssssSs  |
| Q86X95 | CIR1_HUMAN Corepressor interacting with RBPJ 1              | KSSsssssSsssssSstEtS  |
| Q86XR8 | CEP57_HUMAN Centrosomal protein of 57 kDa                   | SNGSMVRHsssPyVVYPSD   |
| Q86YS7 | C2CD5_HUMAN C2 domain-containing protein 5                  | PsKsYsRQsssssDTDLSLtP |
| Q86YZ3 | HORN_HUMAN Hornerin                                         | ERHRsSSGsssSyGQHGGG   |
| Q8IU60 | DCP2_HUMAN m7GpppN-mRNA hydrolase                           | TDAVyDLPsssEDQLEHA    |
| Q8IUC6 | TCAM1_HUMAN TIR domain-containing adapter molecule 1        | SLFPSSLEsssEQKFYNFV   |
| Q8IVH2 | FOXP4_HUMAN Forkhead box protein P4                         | TVLTSRRDsssHEEtPGsH   |
| Q8IW66 | Q8IW66_HUMAN LRRC16A protein (Fragment)                     | RIAVWSLKsssQLNRPGKK   |
| Q8IWA0 | WDR75_HUMAN WD repeat-containing protein 75                 | KTTSRFtLsssRNKKHAKN   |
| Q8IWY7 | Q8IWY7_HUMAN Tau-tubulin kinase                             | TSGPGACIsssFsRMGSSS   |
| Q8IX90 | SKA3_HUMAN Spindle and kinetochore-associated protein 3     | NyPLsKTNsssNDLEVEDR   |
| Q8IXS8 | F126B_HUMAN Protein FAM126B                                 | SQPIGTKPsssSQRGsLRK   |
| Q8IXT1 | DDIAS_HUMAN DNA damage-induced apoptosis suppressor protein | NPYLSALSsssKDLETIVT   |
| Q8IXZ2 | ZC3H3_HUMAN Zinc finger CCCH domain-containing protein 3    | PSSSKASSsssssSSSPASL  |
| Q8IY57 | YAF2_HUMAN YY1-associated factor 2                          | NTERGMSRsssPRGEAssL   |
| Q8IYB3 | SRRM1_HUMAN Serine/arginine repetitive matrix protein 1     | PRPRAPQtsssPPPVRGA    |
| Q8IYB3 | SRRM1_HUMAN Serine/arginine repetitive matrix protein 1     | PPPVRGAsssPQRQsPs     |
| Q8IYB3 | SRRM1_HUMAN Serine/arginine repetitive matrix protein 1     | sPQsVRRVsssRsVsGsPE   |
| Q8IYG6 | LRC56_HUMAN Leucine-rich repeat-containing protein 56       | HPRPRDsGsssPRWSTDLO   |
| Q8IZ08 | GP135_HUMAN Probable G-protein coupled receptor 135         | RLGACNRMsssNPASGVAG   |
| Q8IZ21 | PHAR4_HUMAN Phosphatase and actin regulator 4               | TtPIGNARsssPVQVEEEP   |
| Q8IZD4 | DCP1B_HUMAN mRNA-decapping enzyme 1B                        | CSEPKKITsssAIyDNPNL   |
| Q8N143 | BCL6B_HUMAN B-cell CLL/lymphoma 6 member B protein          | PSGDEASSsssssSSSSSEEG |
| Q8N1G1 | REXO1_HUMAN RNA exonuclease 1 homolog                       | PPSPAPSSsssssSSSTSSAG |
| Q8N2M8 | CLASR_HUMAN CLK4-associating serine/arginine rich protein   | ASARRRSSsssssSSASRts  |
| Q8N350 | DOS_HUMAN Protein Dos                                       | LHAAAsDHsssGNDRDSVR   |

|        |                                                                            |                       |
|--------|----------------------------------------------------------------------------|-----------------------|
| Q8N3F8 | MILK1_HUMAN MICAL-like protein 1                                           | RsPVPSPGsssPQLQVKSS   |
| Q8N3P4 | VPS8_HUMAN Vacuolar protein sorting-associated protein 8 homolog           | AMMAPQKLsssAIPHLHSE   |
| Q8N3X1 | FNBP4_HUMAN Formin-binding protein 4                                       | RELDEEDNsssssEEDRESTA |
| Q8N3Z6 | ZCHC7_HUMAN Zinc finger CCHC domain-containing protein 7                   | EKNSGNSEsssSKPNQKKLI  |
| Q8N5B7 | CERS5_HUMAN Ceramide synthase 5                                            | KDDRSDVEsssEEEDVTTC   |
| Q8N5C8 | TAB3_HUMAN TGF-beta-activated kinase 1 and MAP3K7-binding protein 3        | NGGRtLVHsssDGHIDPQH   |
| Q8N5F7 | NKAP_HUMAN NF-kappa-B-activating protein                                   | KSRKEssDsssKEsQEFL    |
| Q8N5Y2 | MS3L1_HUMAN Male-specific lethal 3 homolog                                 | KKtPVHsRsssPIPLtPsK   |
| Q8N655 | CJ012_HUMAN Uncharacterized protein C10orf12                               | PTKIKPNLsssPRSEETTA   |
| Q8N684 | CPSF7_HUMAN Cleavage and polyadenylation specificity factor subunit 7      | TSQPSSDRsssTEPPPPVR   |
| Q8N684 | CPSF7_HUMAN Cleavage and polyadenylation specificity factor subunit 7      | SysVGAsGsssRKRHRsRE   |
| Q8N6M6 | AMPO_HUMAN Aminopeptidase O                                                | NQEHAsgIsssKYCCDTGN   |
| Q8N7K0 | ZN433_HUMAN Zinc finger protein 433                                        | QCGRsFNCsssFRYHGRTH   |
| Q8N7Q3 | ZN676_HUMAN Zinc finger protein 676                                        | EECGKAsNsssKLMEHKRI   |
| Q8N7Q3 | ZN676_HUMAN Zinc finger protein 676                                        | EECGKAsNsssKLMEHKRI   |
| Q8N806 | UBR7_HUMAN Putative E3 ubiquitin-protein ligase UBR7                       | QNsEPCAGsssESDLQTVF   |
| Q8N8K9 | K1958_HUMAN Uncharacterized protein KIAA1958                               | GVVPSSLHsssQtQMVDEC   |
| Q8N9M1 | CS047_HUMAN Uncharacterized protein C19orf47                               | RtLVGPRGsssEGLGAQMD   |
| Q8N9N8 | EIF1A_HUMAN Probable RNA-binding protein EIF1AD                            | EPQLsGEEsssEDDSDLFV   |
| Q8N9T8 | KRI1_HUMAN Protein KRI1 homolog                                            | ATFYNRtAsssDsEEDPEA   |
| Q8NA72 | POC5_HUMAN Centrosomal protein POC5                                        | DFAsKNRIsssLAIMGVSP   |
| Q8NBA8 | DTWD2_HUMAN DTW domain-containing protein 2                                | PVARPsGAsssQtPNDKER   |
| Q8NDT2 | RB15B_HUMAN Putative RNA-binding protein 15B                               | GGGGsSRRsssssAAAstPPP |
| Q8NEY1 | NAV1_HUMAN Neuron navigator 1                                              | RsLPRPAKsssMsVtGGRG   |
| Q8NFC6 | BD1L1_HUMAN Biorientation of chromosomes in cell division protein 1-like 1 | IVtVEQsPsssKLKVMQTD   |
| Q8NfJ8 | BHE22_HUMAN Class E basic helix-loop-helix protein 22                      | GSGSGSSsssssSSSKKSKE  |
| Q8NFP9 | NBEA_HUMAN Neurobeachin                                                    | TATTLETEsssKIVPNIDA   |
| Q8NFP9 | NBEA_HUMAN Neurobeachin                                                    | GAVDSGSSsssssSSSFVNGA |
| Q8NG27 | PJA1_HUMAN E3 ubiquitin-protein ligase Praja-1                             | LARRGRGESSsGyPEPKYP   |
| Q8NG27 | PJA1_HUMAN E3 ubiquitin-protein ligase Praja-1                             | YRSREQTLsssGESWETLP   |
| Q8NG31 | CASC5_HUMAN Protein CASC5                                                  | SESHSQSKsssDECEEItK   |



|        |                                                                           |                        |
|--------|---------------------------------------------------------------------------|------------------------|
| Q8NG31 | CASC5_HUMAN Protein CASC5                                                 | LsRtPssCsssLDSIKADG    |
| Q8NGU2 | OR9A4_HUMAN Olfactory receptor 9A4                                        | ISTILKIPsssGRRKSFST    |
| Q8NHM5 | KDM2B_HUMAN Lysine-specific demethylase 2B                                | TRESHRSRsssPtAGPSTE    |
| Q8NI08 | NCOA7_HUMAN Nuclear receptor coactivator 7                                | sPGATVsPsssDAEyDKLP    |
| Q8NI35 | INADL_HUMAN InaD-like protein                                             | LTlVRRKtsssTsPLEPPS    |
| Q8TB45 | DPTOR_HUMAN DEP domain-containing mTOR-interacting protein                | YFsSsPtLsssPPVLCNPK    |
| Q8TCH5 | Q8TCH5_HUMAN CDNA FLJ23893 fis, clone LNG14589                            | RAPRTRttssssKRPGNIKE   |
| Q8TEB1 | DCA11_HUMAN DDB1- and CUL4-associated factor 11                           | ---MGsRNsssAGsGSGDP    |
| Q8TEK3 | DOT1L_HUMAN Histone-lysine N-methyltransferase, H3 lysine-79 specific     | PAAsPAHQlLsssPRLGGAAQ  |
| Q8TEW8 | PAR3L_HUMAN Partitioning defective 3 homolog B                            | GPTLGLKKsssLEsLQTAV    |
| Q8TF20 | ZN721_HUMAN Zinc finger protein 721                                       | ECGKVISSsssFAKHKRIH    |
| Q8TF72 | SHRM3_HUMAN Protein Shroom3                                               | RKAIQRtVsssGCEGKRNE    |
| Q8WTT2 | NOC3L_HUMAN Nucleolar complex protein 3 homolog                           | VsFLTRDLsssEPVHAKKR    |
| Q8WUF8 | F172A_HUMAN Protein FAM172A                                               | EKPKIHVQsssDssDEPAE    |
| Q8WUH2 | TGFA1_HUMAN Transforming growth factor-beta receptor-associated protein 1 | AAsRHtNPssssPGTRT---   |
| Q8WUM0 | NU133_HUMAN Nuclear pore complex protein Nup133                           | KALQRDNWsssDGKDDPIE    |
| Q8WWA1 | TMM40_HUMAN Transmembrane protein 40                                      | EQYERNKSssssSSSSssss   |
| Q8WWA1 | TMM40_HUMAN Transmembrane protein 40                                      | ssssSSSSssssssSssSsESN |
| Q8WWI1 | LMO7_HUMAN LIM domain only protein 7                                      | NRAYMRNPsssVPPPsAGs    |
| Q8WWM7 | ATX2L_HUMAN Ataxin-2-like protein                                         | GAQFKLQPsssPENsLDPF    |
| Q8WWQ0 | PHIP_HUMAN PH-interacting protein                                         | KNKTKKAEsssDEEEESEK    |
| Q8WWQ0 | PHIP_HUMAN PH-interacting protein                                         | KRNRssSVsssAAssPERK    |
| Q8WXH0 | SYNE2_HUMAN Nesprin-2                                                     | DMEEDRASsssGtIVQEAY    |
| Q8WXI7 | MUC16_HUMAN Mucin-16                                                      | tGSTSGRQssstAAHGssD    |
| Q8WXI7 | MUC16_HUMAN Mucin-16                                                      | LTSGLRETsssERISSATE    |
| Q8WYL5 | SSH1_HUMAN Protein phosphatase Slingshot homolog 1                        | SMSNLtRsssDsIHSVRG     |
| Q8WYN3 | CSRN3_HUMAN Cysteine/serine-rich nuclear protein 3                        | VRESDDDEVsssESADSGDS   |
| Q8WYP5 | ELYS_HUMAN Protein ELYS                                                   | yLVsRsLPsssQLKGsPQA    |
| Q92539 | LPIN2_HUMAN Phosphatidate phosphatase LPIN2                               | GARPAENDsssDEGSQELE    |
| Q92560 | BAP1_HUMAN Ubiquitin carboxyl-terminal hydrolase BAP1                     | RPIQGgQGsssPVEKEVVE    |
| Q92608 | DOCK2_HUMAN Dedicator of cytokinesis protein 2                            | NKGATLSRsssVGGLsVSS    |
| Q92609 | TBCD5_HUMAN TBC1 domain family member 5                                   | KGLSSKNIsssPsVEsLPG    |
| Q92610 | ZN592_HUMAN Zinc finger protein 592                                       | EsMTKASDsssPSCSSGPR    |

|          |                                                                                  |                      |
|----------|----------------------------------------------------------------------------------|----------------------|
| Q92614-4 | MY18A_HUMAN Isoform 4 of Unconventional myosin-XVIIIa                            | RSAssRRVssssELDLPSGD |
| Q92614   | MY18A_HUMAN Unconventional myosin-XVIIIa                                         | DsGHLstAsssDDLKGEEG  |
| Q92614   | MY18A_HUMAN Unconventional myosin-XVIIIa                                         | RsAssRRVssssELDLPSGD |
| Q92614   | MY18A_HUMAN Unconventional myosin-XVIIIa                                         | AsDDGsLKsssPtSYWksL  |
| Q92625   | ANS1A_HUMAN Ankyrin repeat and SAM domain-containing protein 1A                  | GKTKDHRRssssRSQDSAEG |
| Q92698   | RAD54_HUMAN DNA repair and recombination protein RAD54-like                      | LVtPRKRKsssEtQIQECF  |
| Q92734   | TFG_HUMAN Protein TFG                                                            | sGtPDsIAssssAAHPPGVQ |
| Q92777   | SYN2_HUMAN Synapsin-2                                                            | GPSLPPSSssssSSSSSAPQ |
| Q92805   | GOGA1_HUMAN Golgin subfamily A member 1                                          | GDDFAsDGsssREDLssQL  |
| Q92841   | DDX17_HUMAN Probable ATP-dependent RNA helicase DDX17                            | TSTGRssQsssQQFsGIGR  |
| Q92918   | M4K1_HUMAN Mitogen-activated protein kinase kinase kinase 1                      | RRIRsTHRsssLGIPDADC  |
| Q92954   | PRG4_HUMAN Proteoglycan 4                                                        | VSENQESSssssSSSSSSTI |
| Q92997   | DVL3_HUMAN Segment polarity protein dishevelled homolog DVL-3                    | EDDsTSRFsssteEQssAsR |
| Q93075   | TATD2_HUMAN Putative deoxyribonuclease TATDN2                                    | PRPCGGHAsssLPKSHLEP  |
| Q969I6   | S38A4_HUMAN Sodium-coupled neutral amino acid transporter 4                      | VNIEPDDEsssGEsAPDsy  |
| Q96A32   | MLRS_HUMAN Myosin regulatory light chain 2, skeletal muscle isoform              | KRRtVEGGsssVFSMFDQT  |
| Q96AQ6   | PBIP1_HUMAN Pre-B-cell leukemia transcription factor-interacting protein 1       | WIREEGRCsssDDDtDVDM  |
| Q96D71   | REPS1_HUMAN RaBP1-associated Eps domain-containing protein 1                     | tAIEIRRQsssYDDPWKIT  |
| Q96D71   | REPS1_HUMAN RaBP1-associated Eps domain-containing protein 1                     | WETFsERSsssQTLTQFDS  |
| Q96D71   | REPS1_HUMAN RaBP1-associated Eps domain-containing protein 1                     | RPQPsHsRsssLDMNRTFT  |
| Q96DN6   | MBD6_HUMAN Methyl-CpG-binding domain protein 6                                   | ADPVPSGGsssPRFLPRGN  |
| Q96E39   | RMXL1_HUMAN RNA binding motif protein, X-linked-like-1                           | GysMNFNMsssRGPLPVKR  |
| Q96E39   | RMXL1_HUMAN RNA binding motif protein, X-linked-like-1                           | ytyRDyGHsssRDDyPsRG  |
| Q96E39   | RMXL1_HUMAN RNA binding motif protein, X-linked-like-1                           | GssRyDDysssRDGyGGsR  |
| Q96EB6   | SIR1_HUMAN NAD-dependent protein deacetylase sirtuin-1                           | tPLHVseDsssPERTsPPD  |
| Q96EQ0   | SGTB_HUMAN Small glutamine-rich tetratricopeptide repeat-containing protein beta | NHIRsRsFsssAEEHs---  |
| Q96F86   | EDC3_HUMAN Enhancer of mRNA-decapping protein 3                                  | FRRRHNSWssssRHPNQAtP |
| Q96FF9   | CDCA5_HUMAN Sororin                                                              | PVPNPEAEsssKEGELDAR  |
| Q96G46   | DUS3L_HUMAN tRNA-dihydrouridine(47) synthase [NAD(P)(+)]-like                    | KEQRHWDIsssERLDILRD  |
| Q96GX5   | GWL_HUMAN Serine/threonine-protein kinase greatwall                              | KNSKRdYLsssFLCsDDDR  |
| Q96GY0   | ZC21A_HUMAN Zinc finger C2HC domain-containing protein 1A                        | VPSGKVSSssssLGnKLQTL |
| Q96HA1   | P121A_HUMAN Nuclear envelope pore membrane protein POM 121                       | DHLNKRsrsssMssLtGay  |

|        |                                                                            |                        |
|--------|----------------------------------------------------------------------------|------------------------|
| Q96HA7 | TONSL_HUMAN Tonsoku-like protein                                           | RRSRHGPAssssssEGEDSAGP |
| Q96HP0 | DOCK6_HUMAN Dedicator of cytokinesis protein 6                             | SPHsSRRCsssLGVPLtEV    |
| Q96HR8 | NAF1_HUMAN H/ACA ribonucleoprotein complex non-core subunit<br>NAF1        | SETDSDSSssssSSSSSSsss  |
| Q96HR8 | NAF1_HUMAN H/ACA ribonucleoprotein complex non-core subunit<br>NAF1        | ssssSSSSssssSSSCISLP   |
| Q96JK2 | DCAF5_HUMAN DDB1- and CUL4-associated factor 5                             | PSPEDSSssssSSSsEDEE    |
| Q96JM2 | ZN462_HUMAN Zinc finger protein 462                                        | APIQQLNRsssERDGPVVE    |
| Q96JM2 | ZN462_HUMAN Zinc finger protein 462                                        | EQMKEKMEssssDDEDKEEE   |
| Q96JM3 | CHAP1_HUMAN Chromosome alignment-maintaining phosphoprotein 1              | SVSSAsWKsssVsPssWks    |
| Q96JM3 | CHAP1_HUMAN Chromosome alignment-maintaining phosphoprotein 1              | QessDAELsssEYIKTDLD    |
| Q96JM3 | CHAP1_HUMAN Chromosome alignment-maintaining phosphoprotein 1              | AMDIKGQEsssDQEQVDVE    |
| Q96JY6 | PDLI2_HUMAN PDZ and LIM domain protein 2                                   | GsPFsPPPssssLtGEAAIS   |
| Q96JY6 | PDLI2_HUMAN PDZ and LIM domain protein 2                                   | EGRAAPRQsssFRLlQEAL    |
| Q96MM7 | H6ST2_HUMAN Heparan-sulfate 6-O-sulfotransferase 2                         | LLDKPRKAsssLAGAACAP    |
| Q96MU7 | YTDC1_HUMAN YTH domain-containing protein 1                                | DADRKIRLsssAsREPYKN    |
| Q96N46 | TTC14_HUMAN Tetratricopeptide repeat protein 14                            | VsSADEsVssssssSssGHKRH |
| Q96P56 | CTSR2_HUMAN Cation channel sperm-associated protein 2                      | VSSTsSSysssEsRFSESI    |
| Q96PD2 | DCBD2_HUMAN Discoidin, CUB and LCCL domain-containing protein<br>2         | HEEtPVRysssEVNHLsPR    |
| Q96PE2 | ARHGH_HUMAN Rho guanine nucleotide exchange factor 17                      | LPRTSALKssssELLLtGPG   |
| Q96PV6 | LENG8_HUMAN Leukocyte receptor cluster member 8                            | GAAGGsAKsssNGPVAsAQ    |
| Q96PV7 | F193B_HUMAN Protein FAM193B                                                | CGDDSHSSssssSsSSSSSS   |
| Q96PX1 | RN157_HUMAN RING finger protein 157                                        | RNAQRRLlsssLEDSETRP    |
| Q96Q42 | ALS2_HUMAN Alsin                                                           | QESMQGKKsssLVDIREEE    |
| Q96QD8 | S38A2_HUMAN Sodium-coupled neutral amino acid transporter 2                | FsIsPDEDsssyssNsDFN    |
| Q96RK0 | CIC_HUMAN Protein capicua homolog                                          | WCNKDRKKsssEAKPTsLG    |
| Q96RQ3 | MCCA_HUMAN Methylcrotonoyl-CoA carboxylase subunit alpha,<br>mitochondrial | HDQFSPFSsssGRRLNISy    |
| Q96RT1 | LAP2_HUMAN Protein LAP2                                                    | QPLQVFtGssssDLISGTKA   |
| Q96RT1 | LAP2_HUMAN Protein LAP2                                                    | PPQyNIQysssAAVKDTLW    |
| Q96SD1 | DCR1C_HUMAN Protein artemis                                                | LSTNADsQsssDFEVPstP    |
| Q96SU4 | OSBL9_HUMAN Oxysterol-binding protein-related protein 9                    | GSASVLtHsssGNsLKRPD    |
| Q96T23 | RSF1_HUMAN Remodeling and spacing factor 1                                 | RRVHKRRLsssEsEESyLS    |
| Q96T37 | RBM15_HUMAN Putative RNA-binding protein 15                                | sPDRsPELsssRDRyNsDN    |

|          |                                                                       |                      |
|----------|-----------------------------------------------------------------------|----------------------|
| Q96T58   | MINT_HUMAN Msx2-interacting protein                                   | ssSsDsISsssSTSSDSSD  |
| Q96T58   | MINT_HUMAN Msx2-interacting protein                                   | LRERDERLsssLERNKFys  |
| Q96TC7   | RMD3_HUMAN Regulator of microtubule dynamics protein 3                | RERsDstGsssVYFTASSG  |
| Q99081   | HTF4_HUMAN Transcription factor 12                                    | SSFHRGstsssPyVAAsHt  |
| Q99457   | NP1L3_HUMAN Nucleosome assembly protein 1-like 3                      | SSsSstSDsssSSsTsGss  |
| Q99569   | PKP4_HUMAN Plakophilin-4                                              | sPsQGQVGsssPKRSGMTA  |
| Q99590   | SCAFB_HUMAN Protein SCAF11                                            | SSVAAPEKsssNDsVDEEt  |
| Q99666   | RGPD5_HUMAN RANBP2-like and GRIP domain-containing protein 5/6        | EDALDDsVssssVHAsPLAs |
| Q99742   | NPAS1_HUMAN Neuronal PAS domain-containing protein 1                  | PTPPSVSSssssSSSLADTP |
| Q99814   | EPAS1_HUMAN Endothelial PAS domain-containing protein 1               | TADKEKKRsssERRKEKSR  |
| Q9BQF6-5 | SEN7_HUMAN Isoform 5 of Sentrin-specific protease 7                   | KRKLGRRPsssEIITEGKR  |
| Q9BQI3   | E2AK1_HUMAN Eukaryotic translation initiation factor 2-alpha kinase 1 | QCGVKNDEsssSSIIIFAEP |
| Q9BQI5   | SGIP1_HUMAN SH3-containing GRB2-like protein 3-interacting protein 1  | RPFsPPIHsssPPPIAPLA  |
| Q9BRK4   | LZTS2_HUMAN Leucine zipper putative tumor suppressor 2                | LFGGPASSssssSSSSAADK |
| Q9BRX2   | PELO_HUMAN Protein pelota homolog                                     | ELsDQEGDsssEED-----  |
| Q9BSQ5   | CCM2_HUMAN Malcavernin                                                | HRRALstTsssTTNGNRAT  |
| Q9BSV6   | SEN34_HUMAN tRNA-splicing endonuclease subunit Sen34                  | KLEQASGAsssQEAGSSQA  |
| Q9BT25   | HAUS8_HUMAN HAUS augmin-like complex subunit 8                        | KPATGPTNsssAKKKDKRV  |
| Q9BTA9   | WAC_HUMAN WW domain-containing adapter protein with coiled-coil       | VsPRSLQRsssQRsPsPGP  |
| Q9BTC0   | DIDO1_HUMAN Death-inducer obliterator 1                               | PksILAKPsssPDPRYLSV  |
| Q9BTC0   | DIDO1_HUMAN Death-inducer obliterator 1                               | RNLHSAGRsssPAGEtEGD  |
| Q9BTC8   | MTA3_HUMAN Metastasis-associated protein MTA3                         | TFARALDCsssVRQPSLHM  |
| Q9BTU6   | P4K2A_HUMAN Phosphatidylinositol 4-kinase type 2-alpha                | ETARSHQRsssEsyTQsFQ  |
| Q9BUL5   | PHF23_HUMAN PHD finger protein 23                                     | ETSQDGDAsssEGEMRVMD  |
| Q9BV68   | RN126_HUMAN E3 ubiquitin-protein ligase RNF126                        | LTGVSFSSssssSSSSSPSN |
| Q9BVC5   | ASHWN_HUMAN Ashwin                                                    | NAFRKLsNssssVsPLILSS |
| Q9BWT3   | PAPOG_HUMAN Poly(A) polymerase gamma                                  | LPsKELPDsssPVPANNIR  |
| Q9BXB4   | OSB11_HUMAN Oxysterol-binding protein-related protein 11              | KsRsFsLAsssNsPIsQRR  |
| Q9BXY0   | MAK16_HUMAN Protein MAK16 homolog                                     | sDEDQDGKsssEEEEEEKAL |
| Q9BZD3   | GCOM2_HUMAN Putative GRINL1B complex locus protein 2                  | VssQAEDtsssFDNLFIDR  |
| Q9BZE9   | ASPC1_HUMAN Tether containing UBX domain for GLUT4                    | PGPTRPLtsssAKLPKSLs  |
| Q9BZL4   | PP12C_HUMAN Protein phosphatase 1 regulatory subunit 12C              | GAGLQRsAsssWLEGtsTQ  |
| Q9BZL6   | KPCD2_HUMAN Serine/threonine-protein kinase D2                        | ELLPRRPPssssSssAssyT |
| Q9C0B5   | ZDHC5_HUMAN Palmitoyltransferase ZDHHC5                               | DPLssGsRsssLKsAQGtG  |

|        |                                                                                                                          |                       |
|--------|--------------------------------------------------------------------------------------------------------------------------|-----------------------|
| Q9C0K0 | BC11B_HUMAN B-cell lymphoma/leukemia 11B                                                                                 | IYLEPGPAsssLtPRLTIP   |
| Q9H019 | MFR1L_HUMAN Mitochondrial fission regulator 1-like                                                                       | KPEHKAACsssEEDDCVSL   |
| Q9H040 | SPRTN_HUMAN SprT-like domain-containing protein Spartan                                                                  | SSSSQRRVsssKISLRNsS   |
| Q9H0B6 | KLC2_HUMAN Kinesin light chain 2                                                                                         | GLsDSRtLssssMDLsRRss  |
| Q9H0H5 | RGAP1_HUMAN Rac GTPase-activating protein 1                                                                              | EHQLLKtPssssLsQRVrst  |
| Q9H1B7 | I2BPL_HUMAN Interferon regulatory factor 2-binding protein-like                                                          | --MsAAQVsssRRQSCYLC   |
| Q9H1B7 | I2BPL_HUMAN Interferon regulatory factor 2-binding protein-like                                                          | TTASARRNsssPVsPAsVP   |
| Q9H1R3 | MYLK2_HUMAN Myosin light chain kinase 2, skeletal/cardiac muscle                                                         | AANRFKKIsssGALMALGV   |
| Q9H2D6 | TARA_HUMAN TRIO and F-actin-binding protein                                                                              | CIQQNIPRsssTQQDNPKT   |
| Q9H2G4 | TSYL2_HUMAN Testis-specific Y-encoded-like protein 2                                                                     | PPAKTRRLsssEsPQRDPP   |
| Q9H2S1 | KCNN2_HUMAN Small conductance calcium-activated potassium channel protein 2                                              | RSSsRRRRsssTAPPtSSE   |
| Q9H2X0 | CHRD_HUMAN Chordin                                                                                                       | CQTCPQERsssERQPSGLS   |
| Q9H307 | PININ_HUMAN Pinin                                                                                                        | TSKSRsRSssssssSSStsss |
| Q9H307 | PININ_HUMAN Pinin                                                                                                        | sssSSStsssSGsSSsSG    |
| Q9H307 | PININ_HUMAN Pinin                                                                                                        | SgsSSsSGssssRsSSSSSs  |
| Q9H3Q1 | BORG4_HUMAN Cdc42 effector protein 4                                                                                     | TSKLPKsLsssPVKKANDG   |
| Q9H3S7 | PTN23_HUMAN Tyrosine-protein phosphatase non-receptor type 23                                                            | GAAAADLLsssPEsQHGGt   |
| Q9H4L5 | OSBL3_HUMAN Oxysterol-binding protein-related protein 3                                                                  | KQLMEQDAsssPsAQVIGL   |
| Q9H4L7 | SMRCD_HUMAN SWI/SNF-related matrix-associated actin-dependent regulator of chromatin subfamily A containing DEAD/H box 1 | GGPRKRKLsssEPyEEDEF   |
| Q9H4S2 | GSX1_HUMAN GS homeobox 1                                                                                                 | DDELPMsPsssGKDDRDLT   |
| Q9H4Z3 | PCIF1_HUMAN Phosphorylated CTD-interacting factor 1                                                                      | HsSGSSsSsssEAKDRDSG   |
| Q9H6F5 | CCD86_HUMAN Coiled-coil domain-containing protein 86                                                                     | FGAKKRKGsssQAPAsKKL   |
| Q9H6U6 | BCAS3_HUMAN Breast carcinoma-amplified sequence 3                                                                        | RCsPVPGLsssPsGSPLHG   |
| Q9H6Z4 | RANB3_HUMAN Ran-binding protein 3                                                                                        | AAAEsGsEsssQEAtPEKE   |
| Q9H788 | SH24A_HUMAN SH2 domain-containing protein 4A                                                                             | NQGVVrtLsssAQEDIIRW   |
| Q9H832 | UBE2Z_HUMAN Ubiquitin-conjugating enzyme E2 Z                                                                            | ENAEMDsDssssGTETDLHG  |
| Q9H8G2 | CAAP1_HUMAN Caspase activity and apoptosis inhibitor 1                                                                   | RRKRRstDsssVsGSLQQE   |
| Q9HBL0 | TENS1_HUMAN Tensin-1                                                                                                     | PDysLQHFsssPEsQARAQ   |
| Q9HC84 | MUC5B_HUMAN Mucin-5B                                                                                                     | TATsSKATsssPRTATTLP   |
| Q9HC84 | MUC5B_HUMAN Mucin-5B                                                                                                     | VTSSKATPsssPGTATALP   |
| Q9HCD6 | TANC2_HUMAN Protein TANC2                                                                                                | PHRDSAYIsssPLGsHQVF   |
| Q9HCD6 | TANC2_HUMAN Protein TANC2                                                                                                | HSKLDLERsssQLGsPDVs   |
| Q9HCG8 | CWC22_HUMAN Pre-mRNA-splicing factor CWC22 homolog                                                                       | KLsEETTTsssRIFVKIFF   |



|          |                                                                       |                         |
|----------|-----------------------------------------------------------------------|-------------------------|
| Q9HCK8   | CHD8_HUMAN Chromodomain-helicase-DNA-binding protein 8                | LsKLS PSSSSSSSSSSSSSSSS |
| Q9HCM1   | K1551_HUMAN Uncharacterized protein KIAA1551                          | CQCNSIKNsssEEEKQKEQ     |
| Q9NP61   | ARFG3_HUMAN ADP-ribosylation factor GTPase-activating protein 3       | ARLERLsAsssIssADLFE     |
| Q9NQB0   | TF7L2_HUMAN Transcription factor 7-like 2                             | NESETNQNSsssDSEAERP     |
| Q9NQC3   | RTN4_HUMAN Reticulon-4                                                | DLDQsPLVsssDsPPRPQP     |
| Q9NQW6   | ANLN_HUMAN Actin-binding protein anillin                              | ERLFKQDtsssTtHLAQQL     |
| Q9NR64   | KLHL1_HUMAN Kelch-like protein 1                                      | TFWKKPSSSSSSSSPSSSS     |
| Q9NRA8   | 4ET_HUMAN Eukaryotic translation initiation factor 4E transporter     | NPsrSGSRsssLGstPHEE     |
| Q9NRL2   | BAZ1A_HUMAN Bromodomain adjacent to zinc finger domain protein 1A     | PVKTRGKLsssFssRGQQQ     |
| Q9NS56   | TOPRS_HUMAN E3 ubiquitin-protein ligase Topors                        | SRAHYsRQsssPEFRVQSF     |
| Q9NSC2   | SALL1_HUMAN Sal-like protein 1                                        | HSSTAPSSSSSSSSSSGGGG    |
| Q9NUC0   | SRTD4_HUMAN SERTA domain-containing protein 4                         | ASSPSASSSSSSSSSPPLP     |
| Q9NVW2   | RNF12_HUMAN E3 ubiquitin-protein ligase RLIM                          | GGSSSGSSSSSSSSSSSSSS    |
| Q9NVW2   | RNF12_HUMAN E3 ubiquitin-protein ligase RLIM                          | sssSSSSSSSSSSSSSSSPSS   |
| Q9NWZ3   | IRAK4_HUMAN Interleukin-1 receptor-associated kinase 4                | EQSYMPDsssPENKsLEV      |
| Q9NXR1   | NDE1_HUMAN Nuclear distribution protein nudE homolog 1                | tPIAHRGPsssLNtPGsFR     |
| Q9NXR7-4 | BRE_HUMAN Isoform 4 of BRCA1-A complex subunit BRE                    | EsNRDGEEsssA-----       |
| Q9NXR8   | ING3_HUMAN Inhibitor of growth protein 3                              | NKSSSQSSSSSSSSSLSSCs    |
| Q9NYL2   | MLTK_HUMAN Mitogen-activated protein kinase kinase kinase MLT         | ItPVNQsRsssPtQYGLTK     |
| Q9NYV4   | CDK12_HUMAN Cyclin-dependent kinase 12                                | VsPysRRRsssYERSGsys     |
| Q9NYV4   | CDK12_HUMAN Cyclin-dependent kinase 12                                | PsPyGRRRsssPFLsKRSL     |
| Q9NYZ3   | GTSE1_HUMAN G2 and S phase-expressed protein 1                        | stSNLARKsssGPVWSGAS     |
| Q9NZ81   | PRR13_HUMAN Proline-rich protein 13                                   | YHKHGKHSSSSSSSSSSDSD--  |
| Q9NZJ0   | DTL_HUMAN Denticleless protein homolog                                | RNWVTRtPsssPPItPPAs     |
| Q9NZN8   | CNOT2_HUMAN CCR4-NOT transcription complex subunit 2                  | IPSRtNsMsssGLGsPNRs     |
| Q9NZW4   | DSPP_HUMAN Dentin sialophosphoprotein                                 | DSDSSDSNsssDsDSSDsD     |
| Q9P0J7   | KCMF1_HUMAN E3 ubiquitin-protein ligase KCMF1                         | LSTLVREEsssDEDDRGEM     |
| Q9P0X4   | CAC1I_HUMAN Voltage-dependent T-type calcium channel subunit alpha-1I | RSYSDDEDQsssNIEEFDKL    |
| Q9P1Z0   | ZBTB4_HUMAN Zinc finger and BTB domain-containing protein 4           | ATTTAASSSSSSSSSSSSSS    |
| Q9P1Z0   | ZBTB4_HUMAN Zinc finger and BTB domain-containing protein 4           | SSSSSASSSSSSSSSPPPA     |
| Q9P206-2 | K1522_HUMAN Isoform 2 of Uncharacterized protein KIAA1522             | PQPRSRHPsssDTWSHSQS     |
| Q9P206   | K1522_HUMAN Uncharacterized protein KIAA1522                          | PQPRsRHPsssDTWsHsQS     |
| Q9P218   | COKA1_HUMAN Collagen alpha-1(XX) chain                                | tsATLGPLsssTYYTVRVT     |

|        |                                                                                  |                       |
|--------|----------------------------------------------------------------------------------|-----------------------|
| Q9P242 | NYAP2_HUMAN Neuronal tyrosine-phosphorylated phosphoinositide-3-kinase adapter 2 | SGRSLLRKsssGRRSKEPA   |
| Q9P258 | RCC2_HUMAN Protein RCC2                                                          | KRERPERCssssGGGssGDE  |
| Q9P266 | JCAD_HUMAN Junctional protein associated with coronary artery disease            | LQEEEESSssssSSSSSSEE  |
| Q9P275 | UBP36_HUMAN Ubiquitin carboxyl-terminal hydrolase 36                             | GLDRRGsSsssPEHsAssD   |
| Q9P278 | FNIP2_HUMAN Folliculin-interacting protein 2                                     | CQGSSSVSssssSSsISsHs  |
| Q9P2N5 | RBM27_HUMAN RNA-binding protein 27                                               | PGHPKMIysssNLKtPsKL   |
| Q9P2N6 | KANL3_HUMAN KAT8 regulatory NSL complex subunit 3                                | GsEDLssVsssPtssPKTK   |
| Q9UBC3 | DNM3B_HUMAN DNA (cytosine-5)-methyltransferase 3B                                | TPEIRGRRssssRLsKREVS  |
| Q9UBU9 | NXF1_HUMAN Nuclear RNA export factor 1                                           | FAMPAPtPssssPVptLsPE  |
| Q9UBY9 | HSPB7_HUMAN Heat shock protein beta-7                                            | AERSFHSSssssssSSTSSAS |
| Q9UDX5 | MTFP1_HUMAN Mitochondrial fission process protein 1                              | LYPTVGKpsss-----      |
| Q9UDY2 | ZO2_HUMAN Tight junction protein ZO-2                                            | QysDyDyHssseKlKERPs   |
| Q9UGJ0 | AAKG2_HUMAN 5'-AMP-activated protein kinase subunit gamma-2                      | MsFSGIFRssssKESsPNSN  |
| Q9UGV2 | NDRG3_HUMAN Protein NDRG3                                                        | ARsRtHstssssLGsGEsPF  |
| Q9UH99 | SUN2_HUMAN SUN domain-containing protein 2                                       | ysQGDDDGssssGGssVAGs  |
| Q9UHB7 | AFF4_HUMAN AF4/FMR2 family member 4                                              | GSEHSKsRssssPGKPQAVs  |
| Q9UHB7 | AFF4_HUMAN AF4/FMR2 family member 4                                              | MLKDDLKLssseDsDGEQD   |
| Q9UHB7 | AFF4_HUMAN AF4/FMR2 family member 4                                              | QKKtEGKtssssKEVKEKAP  |
| Q9UHL9 | GT2D1_HUMAN General transcription factor II-I repeat domain-containing protein 1 | sEGNSVSSssssSSSSSNP   |
| Q9UI36 | DACH1_HUMAN Dachshund homolog 1                                                  | INASTGSSssssSSSSSsss  |
| Q9UI36 | DACH1_HUMAN Dachshund homolog 1                                                  | ssssSSSSssssSSSSSSSS  |
| Q9UID3 | VPS51_HUMAN Vacuolar protein sorting-associated protein 51 homolog               | SKRTFsVysssRQQGRYAP   |
| Q9UIF8 | BAZ2B_HUMAN Bromodomain adjacent to zinc finger domain protein 2B                | ALSNPKAtsssPAHPKQTL   |
| Q9UJ14 | GGT7_HUMAN Gamma-glutamyltransferase 7                                           | SARLQRLPssssEMGsQDGs  |
| Q9UJC5 | SH3L2_HUMAN SH3 domain-binding glutamic acid-rich-like protein 2                 | MVIRVFIAsssGFVAIKKK   |
| Q9UJF2 | NGAP_HUMAN Ras GTPase-activating protein nGAP                                    | NGsRsRQQssssREsPVPKV  |
| Q9UKV3 | ACINU_HUMAN Apoptotic chromatin condensation inducer in the nucleus              | DSSSSRSSssssSsSRSRSR  |
| Q9ULD2 | MTUS1_HUMAN Microtubule-associated tumor suppressor 1                            | SPQRIRRVssssGKPtS LKT |
| Q9ULH0 | KDIS_HUMAN Kinase D-interacting substrate of 220 kDa                             | EDPRFLSEssssGPAPHGEP  |
| Q9ULI3 | HEG1_HUMAN Protein HEG homolog 1                                                 | AEFVSDSSssssSSSSSSSS  |
| Q9ULK2 | AT7L1_HUMAN Ataxin-7-like protein 1                                              | KPQsstSSssssSSSSLQTS  |

|          |                                                                                     |                         |
|----------|-------------------------------------------------------------------------------------|-------------------------|
| Q9ULL1   | PKHG1_HUMAN Pleckstrin homology domain-containing family G member 1                 | sQPpYHRsQssSVLINKsM     |
| Q9ULT8   | HECD1_HUMAN E3 ubiquitin-protein ligase HECTD1                                      | EAASQRPLsssASNRLSVS     |
| Q9UMS6   | SYNP2_HUMAN Synaptopodin-2                                                          | VAPKPAVKssssQPvtPVsP    |
| Q9UN79   | SOX13_HUMAN Transcription factor SOX-13                                             | KAPELPNtsssPsLKMSSC     |
| Q9UNH5   | CC14A_HUMAN Dual specificity protein phosphatase CDC14A                             | AVsQPFRLsssLQGsAVtL     |
| Q9UPN3-2 | MACF1_HUMAN Isoform 2 of Microtubule-actin cross-linking factor 1, isoforms 1/2/3/5 | PGKRRRMLsssDAITQEFM     |
| Q9UPN3   | MACF1_HUMAN Microtubule-actin cross-linking factor 1, isoforms 1/2/3/5              | sRAAsPTRsssSAsQsNHs     |
| Q9UPN3   | MACF1_HUMAN Microtubule-actin cross-linking factor 1, isoforms 1/2/3/5              | SLAGDTsNsssPAstGAKT     |
| Q9UPN4   | CP131_HUMAN Centrosomal protein of 131 kDa                                          | FtLPSNARsssALDsPAGP     |
| Q9UPN7   | PP6R1_HUMAN Serine/threonine-protein phosphatase 6 regulatory subunit 1             | LVNtHHLHsssDDEDDRK      |
| Q9UPU5   | UBP24_HUMAN Ubiquitin carboxyl-terminal hydrolase 24                                | RKKTLLEsssQSsKsPsL      |
| Q9UPU5   | UBP24_HUMAN Ubiquitin carboxyl-terminal hydrolase 24                                | PAGIRNRLsssGsNCssGs     |
| Q9UPW6   | SATB2_HUMAN DNA-binding protein SATB2                                               | NVsmVssAsssPSSSRTPQ     |
| Q9UQ35   | SRRM2_HUMAN Serine/arginine repetitive matrix protein 2                             | KPYSLVREssssRsPtPKQK    |
| Q9UQ35   | SRRM2_HUMAN Serine/arginine repetitive matrix protein 2                             | KsPEKLPQssssEssPPsPQ    |
| Q9UQ35   | SRRM2_HUMAN Serine/arginine repetitive matrix protein 2                             | PtKVsrHAsssPEsPKPAP     |
| Q9UQ35   | SRRM2_HUMAN Serine/arginine repetitive matrix protein 2                             | APGsHREIsssPtsKNRSH     |
| Q9UQ35   | SRRM2_HUMAN Serine/arginine repetitive matrix protein 2                             | tPPRRsRSsssPPPQKsK      |
| Q9UQ35   | SRRM2_HUMAN Serine/arginine repetitive matrix protein 2                             | tPsRQSHSsssPHPVKsG      |
| Q9UQ35   | SRRM2_HUMAN Serine/arginine repetitive matrix protein 2                             | PPRQsPsRsssPQPKVKAI     |
| Q9UQ35   | SRRM2_HUMAN Serine/arginine repetitive matrix protein 2                             | PRQRsHsGsssPsPsRVtS     |
| Q9UQ35   | SRRM2_HUMAN Serine/arginine repetitive matrix protein 2                             | LPRysHsGsssPDtKVKPE     |
| Q9UQ35   | SRRM2_HUMAN Serine/arginine repetitive matrix protein 2                             | sPKGGRsRsssPVtELAsR     |
| Q9UQ35   | SRRM2_HUMAN Serine/arginine repetitive matrix protein 2                             | QSTRssGHsssELsPDAVE     |
| Q9UQ35   | SRRM2_HUMAN Serine/arginine repetitive matrix protein 2                             | PrtPsRERsssAssPEMKD     |
| Q9UQ35   | SRRM2_HUMAN Serine/arginine repetitive matrix protein 2                             | PAKERRsSssssssSSssssSS  |
| Q9UQ35   | SRRM2_HUMAN Serine/arginine repetitive matrix protein 2                             | ssssssSSssssSSSSssSS    |
| Q9UQ35   | SRRM2_HUMAN Serine/arginine repetitive matrix protein 2                             | ssssSSSSssSSSSGSSS      |
| Q9UQ35   | SRRM2_HUMAN Serine/arginine repetitive matrix protein 2                             | tPAKRKRssssssssSSssssss |
| Q9UQ35   | SRRM2_HUMAN Serine/arginine repetitive matrix protein 2                             | ssssssSSssssssSSssssss  |

|          |                                                                                            |                            |
|----------|--------------------------------------------------------------------------------------------|----------------------------|
| Q9UQ35   | SRRM2_HUMAN Serine/arginine repetitive matrix protein 2                                    | ssssssssSssssssssSssssssss |
| Q9UQ35   | SRRM2_HUMAN Serine/arginine repetitive matrix protein 2                                    | ssssssssSssssssssSssssssss |
| Q9UQ35   | SRRM2_HUMAN Serine/arginine repetitive matrix protein 2                                    | sssSSsSSsssSPsPAKPG        |
| Q9UQB8   | BAIP2_HUMAN Brain-specific angiogenesis inhibitor 1-associated protein 2                   | tENKtLPRsssMAAGLERN        |
| Q9UQB8   | BAIP2_HUMAN Brain-specific angiogenesis inhibitor 1-associated protein 2                   | HMSLQQGKssstGNLLDKD        |
| Q9UQF2   | JIP1_HUMAN C-Jun-amino-terminal kinase-interacting protein 1                               | sWQDRVsRsssPLKtGEQt        |
| Q9UQF2   | JIP1_HUMAN C-Jun-amino-terminal kinase-interacting protein 1                               | VFMSGRsRsssAESFGLFS        |
| Q9UQM7-2 | KCC2A_HUMAN Isoform B of Calcium/calmodulin-dependent protein kinase type II subunit alpha | SDGVKKRKsssSVQLMESS        |
| Q9Y2F5   | ICE1_HUMAN Little elongation complex subunit 1                                             | ATAFVKtGsssGGDCNQDK        |
| Q9Y2F9   | BTBD3_HUMAN BTB/POZ domain-containing protein 3                                            | KssKKANTsssssNssKLPPV      |
| Q9Y2J0   | RP3A_HUMAN Rabphilin-3A                                                                    | RRASEARMsssRDsEsWDH        |
| Q9Y2J2   | E41L3_HUMAN Band 4.1-like protein 3                                                        | EDDKLsQKsssKLRsPLK         |
| Q9Y2J4   | AMOL2_HUMAN Angiomotin-like protein 2                                                      | RHsPQPpPsssFNEGLLTG        |
| Q9Y2K6   | UBP20_HUMAN Ubiquitin carboxyl-terminal hydrolase 20                                       | EAQPPsPRsssPCRtPEPD        |
| Q9Y2K6   | UBP20_HUMAN Ubiquitin carboxyl-terminal hydrolase 20                                       | HHEGHAKLsssPPRAsPVR        |
| Q9Y2L6   | FRM4B_HUMAN FERM domain-containing protein 4B                                              | AFTFPGQRsssVPHsPRIL        |
| Q9Y2W1   | TR150_HUMAN Thyroid hormone receptor-associated protein 3                                  | ShsRNSDKsssDRsRRSSS        |
| Q9Y2W1   | TR150_HUMAN Thyroid hormone receptor-associated protein 3                                  | RKSAKEKKsssKDsRPsQA        |
| Q9Y3R0   | GRIP1_HUMAN Glutamate receptor-interacting protein 1                                       | GDRILAINsssLKGKPLsE        |
| Q9Y467   | SALL2_HUMAN Sal-like protein 2                                                             | TSKtLASSsssSSSSGAEt        |
| Q9Y478   | AAKB1_HUMAN 5'-AMP-activated protein kinase subunit beta-1                                 | KCsDVsELsssPPGPYHQE        |
| Q9Y487   | VPP2_HUMAN V-type proton ATPase 116 kDa subunit a isoform 2                                | GWNVSAMYsssHPPAEHKK        |
| Q9Y4B4   | ARIP4_HUMAN Helicase ARIP4                                                                 | AQEVICLDsssGsEDEKSS        |
| Q9Y4E1   | FA21C_HUMAN WASH complex subunit FAM21C                                                    | AGAsVKEEsssKPGKKIPA        |
| Q9Y4E6   | WDR7_HUMAN WD repeat-containing protein 7                                                  | PKLLTRPRsssQIPEGFGL        |
| Q9Y520   | PRC2C_HUMAN Protein PRRC2C                                                                 | GGKAAGsPsssDQDEKLPG        |
| Q9Y5B0   | CTDP1_HUMAN RNA polymerase II subunit A C-terminal domain phosphatase                      | EssNEDEGsssEADEMAKA        |
| Q9Y5K6   | CD2AP_HUMAN CD2-associated protein                                                         | sVKLRtRtsssEtEEKKPE        |
| Q9Y5U2   | TSSC4_HUMAN Protein TSSC4                                                                  | SRDHFRNKsssPEDPGAEV        |
| Q9Y5X1   | SNX9_HUMAN Sorting nexin-9                                                                 | AQRGNsRAsssSMKIPLNKF       |
| Q9Y6E0   | STK24_HUMAN Serine/threonine-protein kinase 24                                             | KAEQSHDDsssEDSDAETD        |

|        |                                                            |                     |
|--------|------------------------------------------------------------|---------------------|
| Q9Y6R1 | S4A4_HUMAN Electrogenic sodium bicarbonate cotransporter 1 | AMtHRNLtsssLNDISDKP |
| Q9Y6X4 | F169A_HUMAN Soluble lamin-associated protein of 75 kDa     | KRFQDsefsssQGEDEKts |
| Q9Y6X4 | F169A_HUMAN Soluble lamin-associated protein of 75 kDa     | QSAEKAVDsssEEIEVEVP |
