# Supplementary material for: The generation of phosphoserine stretches in phosphoproteins: mechanism and significance
Source: Royal Society of Chemistry journal article supplement (doi:10.1039/c5mb00337g), 2015-07-17
Supplement: c5mb00337g2.pdf [file c5mb00337g2.pdf]

Table S2 Phosphoserine clusters entirely conforming to the consensus sequences of CK2 and/or Fam20C.

| <b>GROUP 1</b> |                                                                   | <b>Motif: (pS)<sub>n</sub>-E-E-x</b><br><b>x≠[E,D,pS] n≥3</b> |
|----------------|-------------------------------------------------------------------|---------------------------------------------------------------|
| ID             | Description                                                       | Peptide                                                       |
| B3KS81         | SRRM5_HUMAN Serine/arginine repetitive matrix protein 5 GN=SRRM5  | RERRQSRs s s s <u>EEER</u> DHsRSRS                            |
| P05814         | CASB_HUMAN Beta-casein GN=CSN2                                    | REtIEsLs s s s <u>EES</u> ITEYKQK                             |
| P18583         | SON_HUMAN Protein SON GN=SON                                      | MPERAsEs s s s <u>EEK</u> DdYEIFV                             |
| P30414         | NKTR_HUMAN NK-tumor recognition protein GN=NKTR                   | KKRRKEAs s s s <u>EE</u> PRNKHAMN                             |
| P47710         | CASA1_HUMAN Alpha-S1-casein GN=CSN1S1                             | KMEs s I s s s s <u>EE</u> MSLSKCAE                           |
| P67870         | CSK2B_HUMAN Casein kinase II subunit beta GN=CSNK2B               | -----Ms s s s <u>EE</u> VsWISWFC                              |
| Q6ZNB6         | NFXL1_HUMAN NF-X1-type zinc finger protein NFXL1 GN=NFXL1         | LVEEQFs s s s s <u>EE</u> GDEDFEGK                            |
| Q9Y6X4         | F169A_HUMAN Soluble lamin-associated protein of 75 kDa GN=FAM169A | SAEKAVDs s s s <u>EE</u> IEVEVPVV                             |

| <b>GROUP 2</b> |                                                                  | <b>Motif (pS)<sub>n</sub>-E/D-E/D-E/D</b><br><b>n≥3</b> |
|----------------|------------------------------------------------------------------|---------------------------------------------------------|
| P18887         | XRCC1_HUMAN DNA repair protein XRCC1 GN=XRCC1                    | YLMAGPGs s s s <u>EE</u> DEAsHsGG                       |
| P28715         | ERCC5_HUMAN DNA repair protein complementing XP-G cells GN=ERCC5 | MQAALLGs s s s <u>EEEE</u> LEsENRR                      |
| P50402         | EMD_HUMAN Emerin GN=EMD                                          | VHDDDLs s s s <u>EEEE</u> CKDRERP                       |
| Q01831         | XPC_HUMAN DNA repair protein complementing XP-C cells GN=XPC     | RKKRSKPs s s s <u>EE</u> DEGPGDKQ                       |
| Q14978         | NOLC1_HUMAN Nucleolar and coiled-body phosphoprotein 1 GN=NOLC1  | DSSDESs s s s <u>EEEE</u> KKPPTKA                       |
| Q5SYE7         | NHSL1_HUMAN NHS-like protein 1 GN=NHSL1                          | TDQKCsLs s s s <u>EE</u> ERFI sIRR                      |
| Q5T1M5         | FKB15_HUMAN FK506-binding protein 15 GN=FKBP15                   | QEQEKEEs s s s <u>EEEE</u> EKAER                        |
| Q76FK4         | NOL8_HUMAN Nucleolar protein 8 GN=NOL8                           | EDPRLQDs s s s <u>EE</u> EDVTEETD                       |
| Q7Z6E9         | RBBP6_HUMAN E3 ubiquitin-protein ligase RBBP6 GN=RBBP6           | FLPEEPs s s s s <u>EE</u> DDPIPEL                       |
| Q8N3X1         | FNBP4_HUMAN Formin-binding protein 4 GN=FNBP4                    | LDEEDNs s s s s <u>EE</u> DRESTAQK                      |
| Q8N5B7         | CERS5_HUMAN Ceramide synthase 5 GN=CERS5                         | DDRsDVEs s s s <u>EE</u> EDVTTCTK                       |
| Q9BRX2         | PELO_HUMAN Protein pelota homolog GN=PELO                        | LsDQEGDs s s s <u>EE</u> D-----                         |
| Q9BXY0         | MAK16_HUMAN Protein MAK16 homolog GN=MAK16                       | DEDQDGKs s s s <u>EEEE</u> EKALSA                       |

|        |                                                                                      |                       |
|--------|--------------------------------------------------------------------------------------|-----------------------|
| Q9H019 | MFR1L_HUMAN Mitochondrial fission regulator 1-like GN=MFR1L                          | PEHKAACsssEEDDCVSLsK  |
| Q9HCM1 | K1551_HUMAN Uncharacterized protein KIAA1551 GN=KIAA1551                             | QCNSIKNsssEEEKQKEQCs  |
| P35659 | DEK_HUMAN Protein DEK GN=DEK                                                         | PEILsDEsssDEDEKKNKEE  |
| P45973 | CBX5_HUMAN Chromobox protein homolog 5 GN=CBX5                                       | TKRtADsssEDEEEyVVEK   |
| Q02952 | AKA12_HUMAN A-kinase anchor protein 12 GN=AKAP12                                     | KKRARRGsssDEEGGPKAMG  |
| Q13216 | ERCC8_HUMAN DNA excision repair protein ERCC-8 GN=ERCC8                              | PAFEDAWsssDEEG-----   |
| Q13371 | PHLP_HUMAN Phosducin-like protein GN=PDCL                                            | EKLQYyysEDEDsDHEDK    |
| Q13415 | ORC1_HUMAN Origin recognition complex subunit 1 GN=ORC1                              | PAAEIsDsssDEEEASTPPL  |
| Q14839 | CHD4_HUMAN Chromodomain-helicase-DNA-binding protein 4 GN=CHD4                       | FGsKRKRsssEDDDLdVesD  |
| Q14978 | NOLC1_HUMAN Nucleolar and coiled-body phosphoprotein 1 GN=NOLC1                      | KsssEDsssDEEEEQKKPM   |
| Q15047 | SETB1_HUMAN Histone-lysine N-methyltransferase SETDB1 GN=SETDB1                      | LGLQYRDsssEDESsrPTEI  |
| Q56P03 | EAPP_HUMAN E2F-associated phosphoprotein GN=EAPP                                     | sDEEPALsssEDEVdVLLHG  |
| Q56P03 | EAPP_HUMAN E2F-associated phosphoprotein GN=EAPP                                     | CLtGEsEsssEDEFEKEMEA  |
| Q5H9R7 | PP6R3_HUMAN Serine/threonine-protein phosphatase 6 regulatory subunit 3 GN=PPP6R3    | VTTCHIHsssDDEIDFKETG  |
| Q5JSH3 | WDR44_HUMAN WD repeat-containing protein 44 GN=WDR44                                 | HTDQDDPsssDDEGMPytRP  |
| Q5T5U3 | RHG21_HUMAN Rho GTPase-activating protein 21 GN=ARHGAP21                             | PKEKAQPsssEDELdNVFFK  |
| Q6ZMG9 | CERS6_HUMAN Ceramide synthase 6 GN=CERS6                                             | DDRSdIEsssDEEDSEPPGK  |
| Q6ZRS2 | SRCAP_HUMAN Helicase SRCAP GN=SRCAP                                                  | GQGEsEGsssDEDGSRPLTR  |
| Q8N9N8 | EIF1A_HUMAN Probable RNA-binding protein EIF1AD GN=EIF1AD                            | PQLsGEEsssEDDSDLFVNT  |
| Q8WWQ0 | PHIP_HUMAN PH-interacting protein GN=PHIP                                            | NKTKKAEsssDEEEESEKQK  |
| Q96AQ6 | PBIP1_HUMAN Pre-B-cell leukemia transcription factor-interacting protein 1 GN=PBXIP1 | IREEGRCSsssDDDtDvdMEG |
| Q96JM2 | ZN462_HUMAN Zinc finger protein 462 GN=ZNF462                                        | MKEKMEsssDDEdKKEEMN   |
| Q9P0J7 | KCMF1_HUMAN E3 ubiquitin-protein ligase KCMF1 GN=KCMF1                               | TLVREEsssDEDdRGEMAD   |
| Q9UPN7 | PP6R1_HUMAN Serine/threonine-protein phosphatase 6 regulatory subunit 1 GN=PPP6R1    | VNtHHLHsssDDEdDRLKEF  |
| O75925 | PIAS1_HUMAN E3 SUMO-protein ligase PIAS1 GN=PIAS1                                    | VIDLtIDsssDEEEEEPsAK  |
| O75928 | PIAS2_HUMAN E3 SUMO-protein ligase PIAS2 GN=PIAS2                                    | VIDLTIEsssDEEEDPPAKR  |

|        |                                                                       |                      |
|--------|-----------------------------------------------------------------------|----------------------|
| P08240 | SRPR_HUMAN Signal recognition particle receptor subunit alpha GN=SRPR | QLQDLDCsssDDEGAAQNST |
|--------|-----------------------------------------------------------------------|----------------------|

| <b>GROUP 3A</b> |                                                                   | <b>Motif (pS)<sub>n</sub>-E/D-E/D-pS n≥3</b> |
|-----------------|-------------------------------------------------------------------|----------------------------------------------|
| O43164          | PJA2_HUMAN E3 ubiquitin-protein ligase Praja-2 GN=PJA2            | SGTEKDQsssDEsWEtLPGK                         |
| P29590-2        | PML_HUMAN Isoform PML-5 of Protein PML GN=PML                     | EERVVVIssssEDsDAENSVS                        |
| P29590          | PML_HUMAN Protein PML GN=PML                                      | EERVVVIssssEDsDAENSSS                        |
| Q13428          | TCOF_HUMAN Treacle protein GN=TCOF1                               | KREEDsQsssEEsDsEEEAP                         |
| Q13428          | TCOF_HUMAN Treacle protein GN=TCOF1                               | KQEEDsRsssEEsDsDREAL                         |
| Q13428          | TCOF_HUMAN Treacle protein GN=TCOF1                               | GKQDDsGsssEEsDSDGEAP                         |
| Q14978 *        | NOLC1_HUMAN Nucleolar and coiled-body phosphoprotein 1 GN=NOLC1   | ssssssSSSSDDsEEEKAAA                         |
| Q2WVGJ9         | FR1L6_HUMAN Fer-1-like protein 6 GN=FER1L6                        | IYKSPQDsssEDsGQLRIQQ                         |
| Q6IE81          | JADE1_HUMAN Protein Jade-1 GN=JADE1                               | MKRGRLPsssEDsDDNGsLs                         |
| Q6PD62          | CTR9_HUMAN RNA polymerase-associated protein CTR9 homolog GN=CTR9 | IKSKAIIsssDDsDEDKLLK                         |
| Q9UHB7          | AFF4_HUMAN AF4/FMR2 family member 4 GN=AFF4                       | LKDDLKLsssEDsDGEQDCD                         |

\* in the case of the Q14978 cluster the assumption has been made that the three terminal serines conforming to the group 3A motif (SSSDDs) do undergo phosphorylation under certain circumstances.

| <b>GROUP 3B</b> |                                                                                                  | <b>Motif (pS)<sub>n</sub>E/D-pS-E/D n≥3</b> |
|-----------------|--------------------------------------------------------------------------------------------------|---------------------------------------------|
| P28715          | ERCC5_HUMAN DNA repair protein complementing XP-G cells GN=ERCC5                                 | NGGATtSsssDsDDDGGKEK                        |
| P54198          | HIRA_HUMAN Protein HIRA GN=HIRA                                                                  | RPRDLLEsssDsDEKVPLAK                        |
| P56181-2        | NDUV3_HUMAN Isoform 2 of NADH dehydrogenase [ubiquinone] flavoprotein 3, mitochondrial GN=NDUFV3 | PsSsssssssssDsEsDDEADV                      |
| Q13427          | PPIG_HUMAN Peptidyl-prolyl cis-trans isomerase G GN=PPIG                                         | sSsssssssssssDsDsssDSQs                     |
| Q13428          | TCOF_HUMAN Treacle protein GN=TCOF1                                                              | SESTARssssEsEDEDEVIPA                       |
| Q14978          | NOLC1_HUMAN Nucleolar and coiled-body phosphoprotein 1 GN=NOLC1                                  | KKAKKKAsssDsEDsEEEE                         |
| Q6AI08          | HEAT6_HUMAN HEAT repeat-containing protein 6 GN=HEATR6                                           | SSSWKRVsssEsDFsDAEGG                        |
| Q7Z4V5          | HDGR2_HUMAN Hepatoma-derived growth factor-related protein 2 GN=HDGFRP2                          | GRGRGPPsssDsEPEAELEK                        |
| Q8N9T8          | KRII_HUMAN Protein KRII homolog GN=KRII                                                          | TFYNRtAsssDsEEDPEALE                        |
| Q96T23          | RSF1_HUMAN Remodeling and spacing factor 1 GN=RSF1                                               | RVHKRRLsssEsEEsyLSKN                        |
| Q9NZW4          | DSPP_HUMAN Dentin sialophosphoprotein GN=DSPP                                                    | SDSSDSNssssDsDSSDsDSS                       |

| <b>GROUP 3C</b> |                                                                  | <b>Motif (pS)<sub>n</sub>-E/D-pS-pS n≥3</b> |
|-----------------|------------------------------------------------------------------|---------------------------------------------|
| Q15059          | BRD3_HUMAN Bromodomain-containing protein 3 GN=BRD3              | GsSSSSsGssss <u>Dss</u> DsE----             |
| Q8WUF8          | F172A_HUMAN Protein FAM172A GN=FAM172A                           | KPKIHVQsss <u>Dss</u> DEPAEKR               |
| Q9UQ35          | SRRM2_HUMAN Serine/arginine repetitive matrix protein 2 GN=SRRM2 | PEKLPQsssss <u>Ess</u> PPsPQPt              |

| <b>GROUP 4</b> |                                                                         | <b>Motif (pS)<sub>n</sub>-E/D-x-E/D/pS x≠[D, E,pS] n≥3</b> |
|----------------|-------------------------------------------------------------------------|------------------------------------------------------------|
| O95873         | CF047_HUMAN Uncharacterized protein C6orf47 GN=C6orf47                  | PEPRRVDsss <u>ENs</u> GsDWDSA                              |
| P07332         | FES_HUMAN Tyrosine-protein kinase Fes/Fps GN=FES                        | QDDRHstsss <u>EQE</u> REGGRtP                              |
| P23497         | SP100_HUMAN Nuclear autoantigen Sp-100 GN=SP100                         | PsRKRRFsss <u>DFs</u> DLsNGEE                              |
| P46100         | ATRX_HUMAN Transcriptional regulator ATRX GN=ATRX                       | NsKEEGtsss <u>EKs</u> KSsGSSR                              |
| P48634-2       | PRC2A_HUMAN Isoform 2 of Protein PRRC2A GN=PRRC2A                       | WRQRRKQsss <u>EIs</u> LAVRAR                               |
| Q14511         | CASL_HUMAN Enhancer of filamentation 1 GN=NEDD9                         | KEQAPDCsss <u>DGs</u> ERSWMDD                              |
| Q14978         | NOLC1_HUMAN Nucleolar and coiled-body phosphoprotein 1 GN=NOLC1         | PAKKAAssss <u>DSs</u> DSDsSED                              |
| Q5BKY9         | F133B_HUMAN Protein FAM133B GN=FAM133B                                  | sssDsSsssss <u>DSE</u> DEDKKQG                             |
| Q86UV5         | UBP48_HUMAN Ubiquitin carboxyl-terminal hydrolase 48 GN=USP48           | SAPELNVsss <u>E</u> TEEDKKEAK                              |
| Q86YS7         | C2CD5_HUMAN C2 domain-containing protein 5 GN=C2CD5                     | KsYsRQsssss <u>DTD</u> LSLtPKt                             |
| Q8N806         | UBR7_HUMAN Putative E3 ubiquitin-protein ligase UBR7 GN=UBR7            | NsEPCAGsss <u>ESD</u> LQTVFKN                              |
| Q8NI08         | NCOA7_HUMAN Nuclear receptor coactivator 7 GN=NCOA7                     | PGATVsPsss <u>DAE</u> yDKLPDA                              |
| Q92614         | MY18A_HUMAN Unconventional myosin-XVIIIa GN=MYO18A                      | AssRRVsssss <u>ELD</u> LpSGDHC                             |
| Q96HA7         | TONSL_HUMAN Tonsoku-like protein GN=TONSL                               | HGPAssssss <u>EGE</u> DSAGPAR                              |
| Q96JM2         | ZN462_HUMAN Zinc finger protein 462 GN=ZNF462                           | PIQQLNRsss <u>ERD</u> GPPVENE                              |
| Q96JM3         | CHAP1_HUMAN Chromosome alignment-maintaining phosphoprotein 1 GN=CHAMP1 | MDIKGQEssss <u>DQE</u> QVDVESI                             |
| Q96SD1         | DCR1C_HUMAN Protein artemis GN=DCLRE1C                                  | STNADsQsss <u>DFE</u> VpStPEA                              |
| Q9BUL5         | PHF23_HUMAN PHD finger protein 23 GN=PHF23                              | TSQDGDAssss <u>EGE</u> MRVMDDED                            |
| Q9NQB0         | TF7L2_HUMAN Transcription factor 7-like 2 GN=TCF7L2                     | ESETNQNssss <u>DSE</u> AERRPPP                             |

|        |                                                                                |                               |
|--------|--------------------------------------------------------------------------------|-------------------------------|
| Q9UQ35 | SRRM2_HUMAN Serine/arginine repetitive matrix protein 2 GN=SRRM2               | STRsSGHs <u>ss</u> ELsPDAVEKA |
| Q9Y2W1 | TR150_HUMAN Thyroid hormone receptor-associated protein 3 GN=THRAP3            | HsRNSDKs <u>ss</u> DRsRRSSSSR |
| Q9Y520 | PRC2C_HUMAN Protein PRRC2C GN=PRRC2C                                           | GKAAGsPs <u>ss</u> DQDEKLPQD  |
| Q9Y5B0 | CTDP1_HUMAN RNA polymerase II subunit A C-terminal domain phosphatase GN=CTDP1 | ssNEDEGs <u>ss</u> EADEMAKALE |
