# Supplementary material for: The generation of phosphoserine stretches in phosphoproteins: mechanism and significance
Source: Royal Society of Chemistry journal article supplement (doi:10.1039/c5mb00337g), 2015-07-17
Supplement: c5mb00337g3.pdf [file c5mb00337g3.pdf]

Table S3 (pS)n clusters whose generation can be partially attributed to CK2.

| ID           | Description                                                                                | Peptide              |
|--------------|--------------------------------------------------------------------------------------------|----------------------|
| A6NDN3       | GOG6B_HUMAN Putative golgin subfamily A member 6B GN=GOLGA6B                               | QQQEEDRsssCREAVLHRRL |
| A8CG34       | P121C_HUMAN Nuclear envelope pore membrane protein POM 121C GN=POM121C                     | HLNKRsrsssmsslGAYts  |
| A8MUH7       | PDZ1P_HUMAN Putative PDZ domain-containing protein 1P GN=PDZK1P1                           | AHStAsHsssNsEDTEM--- |
| NP_001139669 | coiled-coil domain-containing protein 168 [Homo sapiens]                                   | DVMKKPFsssTQDSFQSQDL |
| O00418       | EF2K_HUMAN Eukaryotic elongation factor 2 kinase GN=EEF2K                                  | LTKsERYsssGsPANsFHFK |
| O00423       | EMAL1_HUMAN Echinoderm microtubule-associated protein-like 1 GN=EML1                       | KSNIKRtsssERVsPGGRRE |
| O00567       | NOP56_HUMAN Nucleolar protein 56 GN=NOP56                                                  | ALAsSENssstPEECEEMsE |
| O14640       | DVL1_HUMAN Segment polarity protein dishevelled homolog DVL-1 GN=DVL1                      | ALSSELEsssFVDSDEDGST |
| O14757       | CHK1_HUMAN Serine/threonine-protein kinase Chk1 GN=CHK1                                    | sEENVKYsssQPEPRTGLSL |
| O14936-3     | CSKP_HUMAN Isoform 3 of Peripheral plasma membrane protein CASK GN=CASK                    | VPSYRTQsssCEDLPSTTQP |
| O14974       | MYPT1_HUMAN Protein phosphatase 1 regulatory subunit 12A GN=PPP1R12A                       | sAssPRLsssLDNKEKEKDS |
| O15014       | ZN609_HUMAN Zinc finger protein 609 GN=ZNF609                                              | LsDMELNsssEDSKGSKRVR |
| O15014       | ZN609_HUMAN Zinc finger protein 609 GN=ZNF609                                              | SKKEKENsssKsKKERSEGV |
| O15047       | SET1A_HUMAN Histone-lysine N-methyltransferase SETD1A GN=SETD1A                            | TAESRRRsssDtAAYPAGTT |
| O43290       | SNUT1_HUMAN U4/U6.U5 tri-snRNP-associated protein 1 GN=SART1                               | EALLKKMsssDtPLGtVALL |
| O43491       | E41L2_HUMAN Band 4.1-like protein 2 GN=EPB41L2                                             | TSLSSESsssSSEsEEEDVG |
| O60292       | SI1L3_HUMAN Signal-induced proliferation-associated 1-like protein 3 GN=SIPA1L3            | FLPLRHRsssEItLSECDAE |
| O60293       | ZC3H1_HUMAN Zinc finger C3H1 domain-containing protein GN=ZFC3H1                           | PPSVRMPsssLsESsPRPSF |
| O60307       | MAST3_HUMAN Microtubule-associated serine/threonine-protein kinase 3 GN=MAST3              | HRFSKVYsssEFLAVQPTPT |
| O60343-2     | TBCD4_HUMAN Isoform 2 of TBC1 domain family member 4 GN=TBC1D4                             | RSPLLRQsssEQCsDGEGRK |
| O60381       | HBP1_HUMAN HMG box-containing protein 1 GN=HBP1                                            | ARPPPvsssKSEPAFPHHH  |
| O60759       | CYTIP_HUMAN Cytohesin-interacting protein GN=CYTIP                                         | KQLALTRsssLSDFSWsQRK |
| O75427       | LRCH4_HUMAN Leucine-rich repeat and calponin homology domain-containing protein 4 GN=LRCH4 | PNsFLFRsssQsGsGPssPD |
| O75494       | SRS10_HUMAN Serine/arginine-rich splicing factor 10 GN=SRSF10                              | KEGRNVYsssRyDDyDRYRR |
| O75496       | GEMI_HUMAN Geminin GN=GMNN                                                                 | TCAEGTVssstDAKPCI--- |
| O75582       | KS6A5_HUMAN Ribosomal protein S6 kinase alpha-5 GN=RPS6KA5                                 | tsTETRsssSSESHSsSSHs |

|        |                                                                                |                        |
|--------|--------------------------------------------------------------------------------|------------------------|
| O75995 | SASH3_HUMAN SAM and SH3 domain-containing protein 3 GN=SASH3                   | KKLsLQRsssFKDFAKsKPs   |
| O94827 | PKHG5_HUMAN Pleckstrin homology domain-containing family G member 5 GN=PLEKHG5 | DAyEVVEsssDEVKLLKEF    |
| O94874 | UFL1_HUMAN E3 UFM1-protein ligase 1 GN=UFL1                                    | RKELQElsSSIKDLVLKSRK   |
| O94876 | TMCC1_HUMAN Transmembrane and coiled-coil domains protein 1 GN=TMCC1           | MQSGRPRssttDAPTSSAM    |
| O95292 | VAPB_HUMAN Vesicle-associated membrane protein-associated protein B/C GN=VAPB  | PIVSKsLsssLDDtEVKKVM   |
| O95696 | BRD1_HUMAN Bromodomain-containing protein 1 GN=BRD1                            | CAsEssIsssNsPLCDSsFN   |
| O95819 | M4K4_HUMAN Mitogen-activated protein kinase kinase kinase kinase 4 GN=MAP4K4   | GERFRVRsssKsEGsPsQRL   |
| P00519 | ABL1_HUMAN Tyrosine-protein kinase ABL1 GN=ABL1                                | APtPPKRsssFREM DGQPER  |
| P04279 | SEMG1_HUMAN Semenogelin-1 GN=SEMG1                                             | ANKIsyQssssteEERRLHYGE |
| P07910 | HNRPC_HUMAN Heterogeneous nuclear ribonucleoproteins C1/C2 GN=HNRNPC           | PsPsPLLsssFDLDyDFQRD   |
| P08913 | ADA2A_HUMAN Alpha-2A adrenergic receptor GN=ADRA2A                             | ALDLEEsssDHAERPPGPR    |
| P0CAP2 | GRL1A_HUMAN DNA-directed RNA polymerase II subunit GRINL1A GN=POLR2M           | ssQAEDtsssFDNLFIDRLQ   |
| P12270 | TPR_HUMAN Nucleoprotein TPR GN=TPR                                             | VssADIsssssEVISQHLVSY  |
| P15056 | BRAF_HUMAN Serine/threonine-protein kinase B-raf GN=BRAF                       | GPQREKsssSsEDRNRMKt    |
| P15408 | FOSL2_HUMAN Fos-related antigen 2 GN=FOSL2                                     | CSKAHRRsssSGDQSSDsLN   |
| P15924 | DESP_HUMAN Desmoplakin GN=DSP                                                  | VRNLtIRsssFsDtLEESSP   |
| P17812 | PYRG1_HUMAN CTP synthase 1 GN=CTPS1                                            | tysDRsGsssPDsEItELKF   |
| P25054 | APC_HUMAN Adenomatous polyposis coli protein GN=APC                            | TPDGFsCsssLsALsLDEPF   |
| P25440 | BRD2_HUMAN Bromodomain-containing protein 2 GN=BRD2                            | AVSRLsAsssSSDSsssssss  |
| P29590 | PML_HUMAN Protein PML GN=PML                                                   | EERVVVIsssEDsDAENSSS   |
| P30305 | MPIP2_HUMAN M-phase inducer phosphatase 2 GN=CDC25B                            | EAGsGAAsssGEDKENDGFV   |
| P33527 | MRP1_HUMAN Multidrug resistance-associated protein 1 GN=ABCC1                  | LQRQLsssSYSGDIsRHNN    |
| P36915 | GNL1_HUMAN Guanine nucleotide-binding protein-like 1 GN=GNL1                   | EEEEEElsssCEEEGEEEDRD  |
| P38159 | RBMX_HUMAN RNA-binding motif protein, X chromosome GN=RBMX                     | GGsRDsYsssRsDLySSGRD   |
| P38159 | RBMX_HUMAN RNA-binding motif protein, X chromosome GN=RBMX                     | ssRyDDysssRDGyGGsRDS   |
| P38159 | RBMX_HUMAN RNA-binding motif protein, X chromosome GN=RBMX                     | tyRDyGHsssRDDyPsRGys   |
| P42167 | LAP2B_HUMAN Lamina-associated polypeptide 2, isoforms beta/gamma GN=TMPO       | stPLPtIsssAENtRQNGsN   |
| P42694 | HELZ_HUMAN Probable helicase with zinc finger domain GN=HELZ                   | LSSRtVsssLPSLEEYEP     |
| P43355 | MAGA1_HUMAN Melanoma-associated antigen 1 GN=MAGEA1                            | QRQPseGsssREEEGPSTSC   |

|          |                                                                                                    |                         |
|----------|----------------------------------------------------------------------------------------------------|-------------------------|
| P43358   | MAGA4_HUMAN Melanoma-associated antigen 4 GN=MAGEA4                                                | WRQPNEGssssQEEEGPStsP   |
| P46100   | ATRX_HUMAN Transcriptional regulator ATRX GN=ATRX                                                  | KMEQQYEssssDGTEKLPERE   |
| P46100   | ATRX_HUMAN Transcriptional regulator ATRX GN=ATRX                                                  | LEESKAtssssNPssPAPDWy   |
| P46100   | ATRX_HUMAN Transcriptional regulator ATRX GN=ATRX                                                  | RlKVQEDssssENKsNsEEEE   |
| P48553   | TPC10_HUMAN Trafficking protein particle complex subunit 10 GN=TRAPPC10                            | LLRRQEsssssLEMPSGVALE   |
| P48634-2 | PRC2A_HUMAN Isoform 2 of Protein PRRC2A GN=PRRC2A                                                  | ERsDsGGssssEPFDRHAPAM   |
| P48730   | KC1D_HUMAN Casein kinase I isoform delta GN=CSNK1D                                                 | RGAPVNIssssDLtGRQDTSR   |
| P49674   | KC1E_HUMAN Casein kinase I isoform epsilon GN=CSNK1E                                               | RGAPANVssssDLtGRQEVsR   |
| P49790   | NU153_HUMAN Nuclear pore complex protein Nup153 GN=NUP153                                          | SNGKNVFssssGtsFsGRKIK   |
| P49815   | TSC2_HUMAN Tuberin GN=TSC2                                                                         | sQPLsKsssssPELQtLQDIL   |
| P50402   | EMD_HUMAN Emerin GN=EMD                                                                            | RRRLsPPssssAAssysFsDL   |
| P51811   | XK_HUMAN Membrane transport protein XK GN=XK                                                       | RDRDEtPssssKTsPEPGQFL   |
| P53999   | TCP4_HUMAN Activated RNA polymerase II transcriptional coactivator p15 GN=SUB1                     | LsSsKQsssssRDDNMFQIGK   |
| P53999   | TCP4_HUMAN Activated RNA polymerase II transcriptional coactivator p15 GN=SUB1                     | sKELVsssssGsDsDsEVDK    |
| P54296   | MYOM2_HUMAN Myomesin-2 GN=MYOM2                                                                    | CHKDAKIssssEHMRIGGSEE   |
| P62633   | CNBP_HUMAN Cellular nucleic acid-binding protein GN=CNBP                                           | DRGFQFVssssLPDlCyRCGE   |
| P62736   | ACTA_HUMAN Actin, aortic smooth muscle GN=ACTA2                                                    | EMATAASssssLEKsyELPDG   |
| P63267   | ACTH_HUMAN Actin, gamma-enteric smooth muscle GN=ACTG2                                             | EMATAASssssLEKsyELPDG   |
| P68032   | ACTC_HUMAN Actin, alpha cardiac muscle 1 GN=ACTC1                                                  | EMATAASssssLEKsyELPDG   |
| P68133   | ACTS_HUMAN Actin, alpha skeletal muscle GN=ACTA1                                                   | EMATAASssssLEKsyELPDG   |
| P78559   | MAP1A_HUMAN Microtubule-associated protein 1A GN=MAP1A                                             | EEEQsQGssssysDwvKNLIS   |
| P84550   | SKOR1_HUMAN SKI family transcriptional corepressor 1 GN=SKOR1                                      | LGPGREGssssPNsKQELQPY   |
| P98082   | DAB2_HUMAN Disabled homolog 2 GN=DAB2                                                              | PDQKKENssssSstPLsNGPL   |
| Q01850   | CDR2_HUMAN Cerebellar degeneration-related protein 2 GN=CDR2                                       | HRKPLKRssssEtILSSLAGS   |
| Q01860   | PO5F1_HUMAN POU domain, class 5, transcription factor 1 GN=POU5F1                                  | RRQKGKRssssDyAQREDFEA   |
| Q02383   | SEMG2_HUMAN Semenogelin-2 GN=SEMG2                                                                 | ENKI syQsssteERHLNCGE   |
| Q02383   | SEMG2_HUMAN Semenogelin-2 GN=SEMG2                                                                 | ENKI syQsssteEERRLNLSGE |
| Q03111   | ENL_HUMAN Protein ENL GN=MLLT1                                                                     | EEsDEDDssssGEEAAGKTNP   |
| Q06190   | P2R3A_HUMAN Serine/threonine-protein phosphatase 2A regulatory subunit B" subunit alpha GN=PPP2R3A | DQRDFtNssssQEEIDKLLMD   |

|          |                                                                                                    |                       |
|----------|----------------------------------------------------------------------------------------------------|-----------------------|
| Q06190   | P2R3A_HUMAN Serine/threonine-protein phosphatase 2A regulatory subunit B" subunit alpha GN=PPP2R3A | PSFGLLRsssVEEKPLsHRN  |
| Q06416   | P5F1B_HUMAN Putative POU domain, class 5, transcription factor 1B GN=POU5F1B                       | RRQKGKRsssDyAQREDFEA  |
| Q07960   | RHG01_HUMAN Rho GTPase-activating protein 1 GN=ARHGAP1                                             | PKsDDsKsssPELVTHLKWD  |
| Q08945   | SSRP1_HUMAN FACT complex subunit SSRP1 GN=SSRP1                                                    | EFVssDEsssGENKsKKKRR  |
| Q08AD1   | CAMP2_HUMAN Calmodulin-regulated spectrin-associated protein 2 GN=CAMSAP2                          | AsGGIRRsssMsYVDGFIGt  |
| Q09666   | AHNK_HUMAN Neuroblast differentiation-associated protein AHNAK GN=AHNAK                            | KKsRLsSSSSNDsGNKVGIQ  |
| Q12888   | TP53B_HUMAN Tumor suppressor p53-binding protein 1 GN=TP53BP1                                      | AsQsFCEsssETPFHFTLPK  |
| Q12929   | EPS8_HUMAN Epidermal growth factor receptor kinase substrate 8 GN=EPS8                             | NItrQNssSSDsGGsIVRDS  |
| Q13427   | PPIG_HUMAN Peptidyl-prolyl cis-trans isomerase G GN=PPIG                                           | ssSSDsDSSSDSQsSsDSsD  |
| Q13439   | GOGA4_HUMAN Golgin subfamily A member 4 GN=GOLGA4                                                  | IKESLFRsssKEsLVRtssR  |
| Q13472   | TOP3A_HUMAN DNA topoisomerase 3-alpha GN=TOP3A                                                     | RsKRPRAsssDMGstAKKPR  |
| Q13501   | SQSTM_HUMAN Sequestosome-1 GN=SQSTM1                                                               | LtPVsPEssstEEKsSsQPs  |
| Q13523   | PRP4B_HUMAN Serine/threonine-protein kinase PRP4 homolog GN=PRPF4B                                 | GMKVEQEsssDDNLEDFDVE  |
| Q13620-1 | CUL4B_HUMAN Isoform 2 of Cullin-4B GN=CUL4B                                                        | KLNsSssSSsNssNEREDFD  |
| Q13620-1 | CUL4B_HUMAN Isoform 2 of Cullin-4B GN=CUL4B                                                        | MAEESSssSSsPtAATsQ    |
| Q14135   | VGLL4_HUMAN Transcription cofactor vestigial-like protein 4 GN=VGLL4                               | KAAKDGAsssPEsAsRRGQP  |
| Q14493   | SLBP_HUMAN Histone RNA hairpin-binding protein GN=SLBP                                             | DFGRERKsssGssDsKEsMs  |
| Q14493   | SLBP_HUMAN Histone RNA hairpin-binding protein GN=SLBP                                             | VDLESAsEsssEPQtssQDDF |
| Q15059   | BRD3_HUMAN Bromodomain-containing protein 3 GN=BRD3                                                | PSRLsSssSSsEsGsSSSsGs |
| Q15349   | KS6A2_HUMAN Ribosomal protein S6 kinase alpha-2 GN=RPS6KA2                                         | RRKSRsKsssLsRLEEEGVV  |
| Q15365   | PCBP1_HUMAN Poly(rC)-binding protein 1 GN=PCBP1                                                    | tGFAGIDsssPEVKGyWAsL  |
| Q15424   | SAFB1_HUMAN Scaffold attachment factor B1 GN=SAFB                                                  | tINNLDtsssDFtILQEIEE  |
| Q15464   | SHB_HUMAN SH2 domain-containing adapter protein B GN=SHB                                           | GsPHLYRsssERRPATPAEV  |
| Q15648   | MED1_HUMAN Mediator of RNA polymerase II transcription subunit 1 GN=MED1                           | IQRMVRLsssDsIGPDVtDI  |
| Q2M2Z5   | KIZ_HUMAN Centrosomal protein kizuna GN=KIZ                                                        | IASEAsFsssEGSPLSRHEN  |
| Q2PPJ7   | RGPA2_HUMAN Ral GTPase-activating protein subunit alpha-2 GN=RALGAPA2                              | ItILVRRsssPAELDLKDDL  |
| Q2PPJ7   | RGPA2_HUMAN Ral GTPase-activating protein subunit alpha-2 GN=RALGAPA2                              | QQQQVLRsssSDIPEPLCS   |
| Q4G0J3   | LARP7_HUMAN La-related protein 7 GN=LARP7                                                          | RtGKRKRsssEDAEsLAPRS  |
| Q4G0X9   | CCD40_HUMAN Coiled-coil domain-containing protein 40 GN=CCDC40                                     | EETQRNVsssLLEKQEKLsV  |

|          |                                                                                     |                       |
|----------|-------------------------------------------------------------------------------------|-----------------------|
| Q53QZ3   | RHG15_HUMAN Rho GTPase-activating protein 15 GN=ARHGAP15                            | ELFKIQRssstELLSHyDsD  |
| Q53TX8   | Q53TX8_HUMAN Putative uncharacterized protein MAP4K4 (Fragment) GN=MAP4K4           | GERFRVRsssKSEGSpsQRL  |
| Q5BKY9   | F133B_HUMAN Protein FAM133B GN=FAM133B                                              | RysSsSssssDsSssssDSE  |
| Q5JQC9   | AKAP4_HUMAN A-kinase anchor protein 4 GN=AKAP4                                      | DyKDAAssssEGNLNLGSL   |
| Q5SXM2   | SNPC4_HUMAN snRNA-activating protein complex subunit 4 GN=SNAPC4                    | SsGGssssssSsSEEDEPEQ  |
| Q5T0W9   | FA83B_HUMAN Protein FAM83B GN=FAM83B                                                | PAFyRLCsssDTLVsEGEEN  |
| Q5T2W1   | NHRF3_HUMAN Na(+)/H(+) exchange regulatory cofactor NHE-RF3 GN=PDZK1                | AHstAsHsssNsEDTEM---  |
| Q5T5C0-2 | STXB5_HUMAN Isoform 2 of Syntaxin-binding protein 5 GN=STXBP5                       | NSFSRSRsssVtsIDKESRE  |
| Q5T5C0   | STXB5_HUMAN Syntaxin-binding protein 5 GN=STXBP5                                    | NsFsRsRsssVtsIDKESRE  |
| Q5T5U3   | RHG21_HUMAN Rho GTPase-activating protein 21 GN=ARHGAP21                            | DSGSRKDsssEVFsDAAKEG  |
| Q5THJ4   | VP13D_HUMAN Vacuolar protein sorting-associated protein 13D GN=VPS13D               | TPSRHRNsssEsAIVPKTVK  |
| Q5VT52   | RPRD2_HUMAN Regulation of nuclear pre-mRNA domain-containing protein 2 GN=RPRD2     | YRIETRVsssCLDLDPDSTEE |
| Q5VU43   | MYOME_HUMAN Myomegalin GN=PDE4DIP                                                   | RRGSTLAsssERKPLENQLG  |
| Q5VWQ8   | DAB2P_HUMAN Disabled homolog 2-interacting protein GN=DAB2IP                        | TRLRQQsssKGDsPELKPR   |
| Q66PJ3   | AR6P4_HUMAN ADP-ribosylation factor-like protein 6-interacting protein 4 GN=ARL6IP4 | ssSssssssSsDGRKKRGK   |
| Q68CZ2   | TENS3_HUMAN Tensin-3 GN=TNS3                                                        | PGQRREsssAERQWVEssP   |
| Q68DN1   | CB016_HUMAN Uncharacterized protein C2orf16 GN=C2orf16                              | PSESRHRsssERRHRSPSQR  |
| Q6DN90   | IQEC1_HUMAN IQ motif and SEC7 domain-containing protein 1 GN=IQSEC1                 | GLKRSALsssLRDLSEAGKR  |
| Q6GYQ0   | RGPA1_HUMAN Ral GTPase-activating protein subunit alpha-1 GN=RALGAPA1               | EEQPLPRsstSdILEPFTV   |
| Q6GYQ0   | RGPA1_HUMAN Ral GTPase-activating protein subunit alpha-1 GN=RALGAPA1               | LTEREPsssLCsIDEEHLT   |
| Q6L8Q7   | PDE12_HUMAN 2',5'-phosphodiesterase 12 GN=PDE12                                     | SLsPssPssWTETDVEERV   |
| Q6PKG0-3 | LARP1_HUMAN Isoform 2 of La-related protein 1 GN=LARP1                              | RPRtAsIsssPsEGtPtVGs  |
| Q6PKG0   | LARP1_HUMAN La-related protein 1 GN=LARP1                                           | RPRtAsIsssPsEGtPtVGs  |
| Q6VY07   | PACS1_HUMAN Phosphofurin acidic cluster sorting protein 1 GN=PACS1                  | FFEGMsQsssQtEIGsLNSK  |
| Q6WKZ4   | RFIP1_HUMAN Rab11 family-interacting protein 1 GN=RAB11FIP1                         | EIKDssPsssPsPKGFRKKH  |
| Q6ZRV2   | FA83H_HUMAN Protein FAM83H GN=FAM83H                                                | -MARRsQsssQGDNPLAPGy  |
| Q6ZW76   | ANKS3_HUMAN Ankyrin repeat and SAM domain-containing protein 3 GN=ANKS3             | PEKYEDLsssDESCPAPQRQ  |
| Q71RC2   | LARP4_HUMAN La-related protein 4 GN=LARP4                                           | KEyEVMYsssCETTRNTTGI  |
| Q76L83   | ASXL2_HUMAN Putative Polycomb group protein ASXL2 GN=ASXL2                          | CKNATGEsssSKEDDtDEES  |

|        |                                                                                |                       |
|--------|--------------------------------------------------------------------------------|-----------------------|
| Q7LBC6 | KDM3B_HUMAN Lysine-specific demethylase 3B GN=KDM3B                            | SESLADDsssRDsFKQsLES  |
| Q7Z2Z1 | TICRR_HUMAN Treslin GN=TICRR                                                   | RIKKIDPsssLEAEPLsKEE  |
| Q7Z4S6 | KI21A_HUMAN Kinesin-like protein KIF21A GN=KIF21A                              | GKVTRKLsssDAPAQDtGSs  |
| Q7Z4V5 | HDGR2_HUMAN Hepatoma-derived growth factor-related protein 2 GN=HDGFRP2        | RsAssssssSSsDsDVSVK   |
| Q7Z591 | AKNA_HUMAN AT-hook-containing transcription factor GN=AKNA                     | DKRDVDRsssQsWEEERLFP  |
| Q86TC9 | MYPN_HUMAN Myopalladin GN=MYPN                                                 | NKVMQENsssFSDLSEERRER |
| Q86V48 | LUZP1_HUMAN Leucine zipper protein 1 GN=LUZP1                                  | ALAssRRsssEGLsKGKKAA  |
| Q86VP3 | PACS2_HUMAN Phosphofurin acidic cluster sorting protein 2 GN=PACS2             | YFEGLSHsssQtEIGSIHSA  |
| Q86WB0 | NIPA_HUMAN Nuclear-interacting partner of ALK GN=ZC3HC1                        | RARLCsssssDtssRsFFDP  |
| Q86WB0 | NIPA_HUMAN Nuclear-interacting partner of ALK GN=ZC3HC1                        | sRtRsWDsssPVDRPEPEAA  |
| Q86X02 | CDR2L_HUMAN Cerebellar degeneration-related protein 2-like GN=CDR2L            | KDAFRLHsssLELGPRPLEQ  |
| Q8IU60 | DCP2_HUMAN m7GpppN-mRNA hydrolase GN=DCP2                                      | DAVyDLPsssEDQLLEHAEG  |
| Q8IUC6 | TCAM1_HUMAN TIR domain-containing adapter molecule 1 GN=TICAM1                 | LFPSSLEsssEQKFYNFVIL  |
| Q8IVH2 | FOXP4_HUMAN Forkhead box protein P4 GN=FOXP4                                   | VLTSRRDsssHEEtPGsHPL  |
| Q8IX90 | SKA3_HUMAN Spindle and kinetochore-associated protein 3 GN=SKA3                | yPLsKTNsssNDLEVEDRTS  |
| Q8IXT1 | DDIAS_HUMAN DNA damage-induced apoptosis suppressor protein GN=DDIAS           | PYLSALSsssKDLETIVTLK  |
| Q8N350 | DOS_HUMAN Protein Dos GN=DOS                                                   | HAAAsDHsssGNDRDSVRSg  |
| Q8N5C8 | TAB3_HUMAN TGF-beta-activated kinase 1 and MAP3K7-binding protein 3 GN=TAB3    | GGRtLVHsssDGHIDPQHAA  |
| Q8N684 | CPSF7_HUMAN Cleavage and polyadenylation specificity factor subunit 7 GN=CPSF7 | SQPSSDRsssTEPPPPVRQE  |
| Q8N9M1 | CS047_HUMAN Uncharacterized protein C19orf47 GN=C19orf47                       | LVGPRGsssEGLGAQMDHA   |
| Q8NG27 | PJA1_HUMAN E3 ubiquitin-protein ligase Praja-1 GN=PJA1                         | RSREQTLsssGEsWETLPGK  |
| Q8NG31 | CASC5_HUMAN Protein CASC5 GN=CASC5                                             | ESHsQSKsssDECEEItKSR  |
| Q8NG31 | CASC5_HUMAN Protein CASC5 GN=CASC5                                             | sRtPssCsssLDSIKADGTs  |
| Q8NI35 | INADL_HUMAN InaD-like protein GN=INADL                                         | TLVRRKtsssTsPLEPPSDR  |
| Q8TEW8 | PAR3L_HUMAN Partitioning defective 3 homolog B GN=PARD3B                       | PTLGLKKsssLEsLQTAVAE  |
| Q8TF72 | SHRM3_HUMAN Protein Shroom3 GN=SHROOM3                                         | KAIQRtVsssGCEGKRNEDEK |
| Q8WTT2 | NOC3L_HUMAN Nucleolar complex protein 3 homolog GN=NOC3L                       | sFLTRDLsssEPVHAKKRKH  |
| Q8WUM0 | NU133_HUMAN Nuclear pore complex protein Nup133 GN=NUP133                      | ALQRDNWsssDGKDDPIEVs  |
| Q8WWA1 | TMM40_HUMAN Transmembrane protein 40 GN=TMEM40                                 | SSSsssssssSsssSsESNDE |

|        |                                                                            |                        |
|--------|----------------------------------------------------------------------------|------------------------|
| Q8WWM7 | ATX2L_HUMAN Ataxin-2-like protein GN=ATXN2L                                | AQFKLQPssssPENsLDPFPP  |
| Q8WWQ0 | PHIP_HUMAN PH-interacting protein GN=PHIP                                  | RNRssSVssssAAssPERKKR  |
| Q8WXI7 | MUC16_HUMAN Mucin-16 GN=MUC16                                              | TSGLRETssssERISSATEGS  |
| Q8WYL5 | SSH1_HUMAN Protein phosphatase Slingshot homolog 1 GN=SSH1                 | SSNLtRssssDsIHSVRGKP   |
| Q8WYN3 | CSRNP3_HUMAN Cysteine/serine-rich nuclear protein 3 GN=CSRNP3              | RESDDEVssssESADSGDSVN  |
| Q92539 | LPIN2_HUMAN Phosphatidate phosphatase LPIN2 GN=LPIN2                       | ARPAENDssssDEGSQELEES  |
| Q92560 | BAP1_HUMAN Ubiquitin carboxyl-terminal hydrolase BAP1 GN=BAP1              | PIQGsQGssssPVEKEVVEAT  |
| Q92614 | MYO18A_HUMAN Unconventional myosin-XVIIIa GN=MYO18A                        | AssRRVssssELDLPSGDHC   |
| Q92614 | MYO18A_HUMAN Unconventional myosin-XVIIIa GN=MYO18A                        | sGHLstAsssDDLKGEEGsF   |
| Q92698 | RAD54_HUMAN DNA repair and recombination protein RAD54-like GN=RAD54L      | VtPRKRKssssEtQIQECFLs  |
| Q92805 | GOLGA1_HUMAN Golgin subfamily A member 1 GN=GOLGA1                         | DDFAsDGssssREDLssQLLR  |
| Q92997 | DVL3_HUMAN Segment polarity protein dishevelled homolog DVL-3 GN=DVL3      | DDsTSRFssstEQssAsRLM   |
| Q96D71 | REPS1_HUMAN RaBP1-associated Eps domain-containing protein 1 GN=REPS1      | AIEIRRQsssyDDPWKITDE   |
| Q96D71 | REPS1_HUMAN RaBP1-associated Eps domain-containing protein 1 GN=REPS1      | PQPpHsRssssLDMNRTFTVT  |
| Q96E39 | RMXL1_HUMAN RNA binding motif protein, X-linked-like-1 GN=RBMXL1           | ssRyDDyssssRDGyGGsRDS  |
| Q96E39 | RMXL1_HUMAN RNA binding motif protein, X-linked-like-1 GN=RBMXL1           | tyrDyGHssssRDDyPsRGYG  |
| Q96EB6 | SIRT1_HUMAN NAD-dependent protein deacetylase sirtuin-1 GN=SIRT1           | PLHVseDssssPERTsPPDsS  |
| Q96FF9 | CDCA5_HUMAN Sororin GN=CDCA5                                               | VPNPEAEssssKEGELDARDL  |
| Q96G46 | DUS3L_HUMAN tRNA-dihydrouridine(47) synthase [NAD(P)(+)]-like GN=DUS3L     | EQRHWDIssssERLDILRDFT  |
| Q96JM3 | CHAMP1_HUMAN Chromosome alignment-maintaining phosphoprotein 1 GN=CHAMP1   | EssDAELssssEYIKTDLDAM  |
| Q96JM3 | CHAMP1_HUMAN Chromosome alignment-maintaining phosphoprotein 1 GN=CHAMP1   | VSSAsWKssssVsPssWKsPP  |
| Q96P56 | CTSPER2_HUMAN Cation channel sperm-associated protein 2 GN=CATSPER2        | STsSSyssssEsRFSESIGR   |
| Q96PD2 | DCBLD2_HUMAN Discoidin, CUB and LCCL domain-containing protein 2 GN=DCBLD2 | EEtPVRyssssEVNHLsPREV  |
| Q96PE2 | ARHGAP17_HUMAN Rho guanine nucleotide exchange factor 17 GN=ARHGAP17       | RTSALKssssELLLtGPGAE   |
| Q96Q42 | ALS2_HUMAN Alsln GN=ALS2                                                   | ESMQGKKssssLVDIREEEETE |
| Q96QD8 | SLC38A2_HUMAN Sodium-coupled neutral amino acid transporter 2 GN=SLC38A2   | sIsPDEDsssyssNsDFNyS   |
| Q96RK0 | CIC_HUMAN Protein capicua homolog GN=CIC                                   | CNKDRKKssssEAKPTsLGLA  |
| Q96RT1 | LAP2_HUMAN Protein LAP2 GN=ERBB2IP                                         | QVFtGssssssDLISGTKAIF  |
| Q96T37 | RBM15_HUMAN Putative RNA-binding protein 15 GN=RBM15                       | PDRsPELssssRDRyNsDNDR  |

|          |                                                                                                                                     |                       |
|----------|-------------------------------------------------------------------------------------------------------------------------------------|-----------------------|
| Q96T58   | MINT_HUMAN Msx2-interacting protein GN=SPEN                                                                                         | RERDERLsssLERNKFysFA  |
| Q99814   | EPAS1_HUMAN Endothelial PAS domain-containing protein 1 GN=EPAS1                                                                    | ADKEKKRsssERRKEKSRDA  |
| Q9BQF6-5 | SENP7_HUMAN Isoform 5 of Sentrin-specific protease 7 GN=SENP7                                                                       | RKLGRRPsssEIIITEGKRKK |
| Q9BSV6   | SEN34_HUMAN tRNA-splicing endonuclease subunit Sen34 GN=TSEN34                                                                      | LEQASGAsssQEAGSSQAAK  |
| Q9BTC0   | DIDO1_HUMAN Death-inducer obliterator 1 GN=DIDO1                                                                                    | KsILAKPsssPDPRYLSVPP  |
| Q9BTU6   | P4K2A_HUMAN Phosphatidylinositol 4-kinase type 2-alpha GN=PI4K2A                                                                    | TARSHQRsssEsytQsFQSR  |
| Q9BVC5   | ASHWN_HUMAN Ashwin GN=C2orf49                                                                                                       | FRKLsNssssVsPLILSSNL  |
| Q9BXB4   | OSB11_HUMAN Oxysterol-binding protein-related protein 11 GN=OSBPL11                                                                 | sRsFsLAsssNsPIsQRRPs  |
| Q9BZD3   | GCOM2_HUMAN Putative GRINL1B complex locus protein 2 GN=GCOM2                                                                       | ssQAEDtsssFDNLFIDRLQ  |
| Q9BZL4   | PP12C_HUMAN Protein phosphatase 1 regulatory subunit 12C GN=PPP1R12C                                                                | AGLQRsAsssWLEGtsTQAK  |
| Q9H0B6   | KLC2_HUMAN Kinesin light chain 2 GN=KLC2                                                                                            | sDSRtLssssMDLsRRssLV  |
| Q9H1B7   | I2BPL_HUMAN Interferon regulatory factor 2-binding protein-like GN=IRF2BPL                                                          | TASARRNsssPVsPAsVPGQ  |
| Q9H2G4   | TSYL2_HUMAN Testis-specific Y-encoded-like protein 2 GN=TSPYL2                                                                      | PAKTRRLsssEsPQRDPPPP  |
| Q9H2X0   | CHRD_HUMAN Chordin GN=CHRD                                                                                                          | QTCPQERsssERQPSGLSFE  |
| Q9H3S7   | PTN23_HUMAN Tyrosine-protein phosphatase non-receptor type 23 GN=PTPN23                                                             | AAAADLLsssPEsQHGGtQs  |
| Q9H4L7   | SMRCD_HUMAN SWI/SNF-related matrix-associated actin-dependent regulator of chromatin subfamily A containing DEAD/H box 1 GN=SMARCA1 | PRKRKLsssssEPyEEDEFND |
| Q9H4S2   | GSX1_HUMAN GS homeobox 1 GN=GSX1                                                                                                    | DELPMsPsssGKDDRDLTVT  |
| Q9H4Z3   | PCIF1_HUMAN Phosphorylated CTD-interacting factor 1 GN=PCIF1                                                                        | sSGSSsSsssEAKDRDSGRE  |
| Q9H6Z4   | RANB3_HUMAN Ran-binding protein 3 GN=RANBP3                                                                                         | AAEsGsEsssQEAtPEKESL  |
| Q9H788   | SH24A_HUMAN SH2 domain-containing protein 4A GN=SH2D4A                                                                              | QGVVRtLsssAQEDIIRWFK  |
| Q9H832   | UBE2Z_HUMAN Ubiquitin-conjugating enzyme E2 Z GN=UBE2Z                                                                              | AEMDsDssssGTETDLHGSL  |
| Q9HBL0   | TENS1_HUMAN Tensin-1 GN=TNS1                                                                                                        | DysLQHFsssPEsQARAQFs  |
| Q9NQC3   | RTN4_HUMAN Reticulon-4 GN=RTN4                                                                                                      | LDQsPLVsssDsPPRPQPAF  |
| Q9NS56   | TOPRS_HUMAN E3 ubiquitin-protein ligase Topors GN=TOPORS                                                                            | RAHysRQsssPEFRVQSFSE  |
| Q9NWZ3   | IRAK4_HUMAN Interleukin-1 receptor-associated kinase 4 GN=IRAK4                                                                     | QSYMPPDsssPENKsLEVSD  |
| Q9NYV4   | CDK12_HUMAN Cyclin-dependent kinase 12 GN=CDK12                                                                                     | sPysRRRsssYERSGsysGR  |
| Q9P0X4   | CAC11_HUMAN Voltage-dependent T-type calcium channel subunit alpha-1I GN=CACNA1I                                                    | SYSDQDQsssNIEEFDKLQE  |
| Q9P206-2 | K1522_HUMAN Isoform 2 of Uncharacterized protein KIAA1522 GN=KIAA1522                                                               | PRSRHPsssDTWSHSQSSD   |



|          |                                                                                              |                       |
|----------|----------------------------------------------------------------------------------------------|-----------------------|
| Q9P206   | K1522_HUMAN Uncharacterized protein KIAA1522 GN=KIAA1522                                     | PRsRHPsSSSSDTWshsQSSD |
| Q9P275   | UBP36_HUMAN Ubiquitin carboxyl-terminal hydrolase 36 GN=USP36                                | LDRRGsSSSSPEHsAssDST  |
| Q9UDY2   | ZO2_HUMAN Tight junction protein ZO-2 GN=TJP2                                                | ysDyDyHsssEKLKERPssR  |
| Q9UGJ0   | AAKG2_HUMAN 5'-AMP-activated protein kinase subunit gamma-2 GN=PRKAG2                        | sFSGIFRsssKESsPNSNPA  |
| Q9UHB7   | AFF4_HUMAN AF4/FMR2 family member 4 GN=AFF4                                                  | KtEGKtSSSSKEVKEKAPSS  |
| Q9UJ14   | GGT7_HUMAN Gamma-glutamyltransferase 7 GN=GGT7                                               | RLQRLPSSSSEMGsQDGsPL  |
| Q9UJF2   | NGAP_HUMAN Ras GTPase-activating protein nGAP GN=RASAL2                                      | sRsRQQSSSSREsPVPKVRA  |
| Q9UPN3-2 | MACF1_HUMAN Isoform 2 of Microtubule-actin cross-linking factor 1, isoforms 1/2/3/5 GN=MACF1 | GKRRRMLSSSDAITQEFMDL  |
| Q9UPN4   | CP131_HUMAN Centrosomal protein of 131 kDa GN=CEP131                                         | tLPSNARSSSALDsPAGPRR  |
| Q9UQ35   | SRRM2_HUMAN Serine/arginine repetitive matrix protein 2 GN=SRRM2                             | PRysHsGSSSPDtKVKPEtP  |
| Q9UQ35   | SRRM2_HUMAN Serine/arginine repetitive matrix protein 2 GN=SRRM2                             | RQRsHsGSSSPsPsRVtSRt  |
| Q9UQ35   | SRRM2_HUMAN Serine/arginine repetitive matrix protein 2 GN=SRRM2                             | RtPsRERSSSAssPEMKDGL  |
| Q9UQ35   | SRRM2_HUMAN Serine/arginine repetitive matrix protein 2 GN=SRRM2                             | YSLVRESSSSRsPtPKQKKK  |
| Q9UQ35   | SRRM2_HUMAN Serine/arginine repetitive matrix protein 2 GN=SRRM2                             | ssSSsSSSSSPsPAKPGPQ   |
| Q9UQ35   | SRRM2_HUMAN Serine/arginine repetitive matrix protein 2 GN=SRRM2                             | ssSSSSSSSSSSSSSSSP    |
| Q9UQF2   | JIP1_HUMAN C-Jun-amino-terminal kinase-interacting protein 1 GN=MAPK8IP1                     | FMSGRsRsssAESFGLFSCI  |
| Q9Y2F5   | ICE1_HUMAN Little elongation complex subunit 1 GN=ICE1                                       | TAFVKtGSSGGDCNQDKSR   |
| Q9Y2J0   | RP3A_HUMAN Rabphilin-3A GN=RPH3A                                                             | ASEARMSSSSRDsEsWDHSG  |
| Q9Y2J4   | AMOL2_HUMAN Angiotenin-like protein 2 GN=AMOTL2                                              | HsPQPpPSSSFNEGLLTGGH  |
| Q9Y2W1   | TR150_HUMAN Thyroid hormone receptor-associated protein 3 GN=THRAP3                          | KSAKEKKSSSKDsRPsQAAG  |
| Q9Y5U2   | TSSC4_HUMAN Protein TSSC4 GN=TSSC4                                                           | RDHFRNKSSSPEDPGAEV--  |
| Q9Y6E0   | STK24_HUMAN Serine/threonine-protein kinase 24 GN=STK24                                      | AEQSHDDSSSEDSAEtDGQ   |
| Q9Y6R1   | S4A4_HUMAN Electrogenic sodium bicarbonate cotransporter 1 GN=SLC4A4                         | MtHRNltSSSLNDISDKPEK  |
| Q9Y6X4   | F169A_HUMAN Soluble lamin-associated protein of 75 kDa GN=FAM169A                            | RFQDsEFSSSQGEDEKtSQT  |
| O15541   | R113A_HUMAN RING finger protein 113A GN=RNF113A                                              | PGEsGSSSDEGCTVVR      |
| Q68E01   | INT3_HUMAN Integrator complex subunit 3 GN=INTS3                                             | EEEsGSSSAsEEEDTK      |
| Q8N5F7   | NKAP_HUMAN NF-kappa-B-activating protein GN=NKAP                                             | KESSDSSSKesQEEFL      |
| Q969I6   | S38A4_HUMAN Sodium-coupled neutral amino acid transporter 4 GN=SLC38A4                       | EPDDESSSGEsAPDsy      |

|        |                                                                                          |                  |
|--------|------------------------------------------------------------------------------------------|------------------|
| Q96EQ0 | SGTB_HUMAN Small glutamine-rich tetratricopeptide repeat-containing protein beta GN=SGTB | RsRsFsssAEEHs--- |
| Q96PX1 | RN157_HUMAN RING finger protein 157 GN=RNF157                                            | QRRRLssssLEDSETR |
| Q96PX1 | RN157_HUMAN RING finger protein 157 GN=RNF157                                            | RRRLssssLEDSETRP |
| Q99590 | SCAFB_HUMAN Protein SCAF11 GN=SCAF11                                                     | AAPEKsssNDsVDEEt |
| Q9NP61 | ARFG3_HUMAN ADP-ribosylation factor GTPase-activating protein 3 GN=ARFGAP3               | ERLsAsssIssADLFE |
| Q9UGV2 | NDRG3_HUMAN Protein NDRG3 GN=NDRG3                                                       | RtHstssslGsGEsPF |
| Q9UPU5 | UBP24_HUMAN Ubiquitin carboxyl-terminal hydrolase 24 GN=USP24                            | IRNRLsssgsNCssGs |
| Q9Y4B4 | ARIP4_HUMAN Helicase ARIP4 GN=RAD54L2                                                    | VICLDsssgsEDEKSS |
| Q9Y5K6 | CD2AP_HUMAN CD2-associated protein GN=CD2AP                                              | LRtRtssSEtEEKKPE |
